1 Sex differences in NK cells mediated by the X-linked epigenetic regulator  
2 UTX

3  
4 Mandy I. Cheng<sup>1,2</sup>, Luke Riggan<sup>1,2</sup>, Joey H. Li<sup>1,2</sup>, Rana Yakhshi Tafti<sup>1,2</sup>, Scott Chin<sup>1</sup>, Feiyang  
5 Ma<sup>3,4</sup>, Matteo Pellegrini<sup>3,4</sup>, Haley Hrcir<sup>6</sup>, Arthur P. Arnold<sup>6</sup>, Timothy E. O'Sullivan<sup>1,2,\*</sup> and  
6 Maureen A. Su<sup>1,2,5,\*</sup>

7  
8 <sup>1</sup>*Department of Microbiology, Immunology, and Molecular Genetics, David Geffen School of Medicine at  
9 UCLA, Los Angeles, CA 90095*

10 <sup>2</sup>*Molecular Biology Institute, University of California, Los Angeles, Los Angeles, CA 90095, USA*

11 <sup>3</sup>*Department of Molecular, Cell, and Developmental Biology, University of California, Los Angeles,  
12 California, USA.*

13 <sup>4</sup>*Institute for Genomics and Proteomics, University of California, Los Angeles, California, USA.*

14 <sup>5</sup>*Department of Pediatrics, David Geffen School of Medicine at UCLA, Los Angeles, CA 90095*

15 <sup>6</sup>*Department of Physiological Science, Laboratory of Neuroendocrinology of the Brain Research Institute,  
16 University of California, Los Angeles, CA 90095-1606, USA.*

17 \*Corresponding Authors  
18

19 Correspondence:

20 Timothy E. O'Sullivan, PhD  
21 David Geffen School of Medicine at UCLA  
22 615 Charles E. Young Drive South, BSRB 245F  
23 Los Angeles, CA 90095  
24 Phone: 310-825-4454  
25 Email: [tosullivan@mednet.ucla.edu](mailto:tosullivan@mednet.ucla.edu)

26  
27 Maureen A. Su, MD  
28 David Geffen School of Medicine at UCLA  
29 615 Charles E. Young Drive South, BSRB 290C  
30 Los Angeles, CA 90095  
31 Phone: 310-825-2130  
32 Email: [masu@mednet.ucla.edu](mailto:masu@mednet.ucla.edu)  
33

34

35

36

37

38

39

40

41

42 **Abstract**

43 Viral infection outcomes are sex-biased, with males generally more susceptible than females.  
44 Paradoxically, the numbers of anti-viral natural killer (NK) cells are increased in males  
45 compared to females. Using samples from mice and humans, we demonstrate that while  
46 numbers of male NK cells are increased compared to females, they display impaired production  
47 of the anti-viral cytokine IFN- $\gamma$ . These sex differences were not due solely to divergent levels of  
48 gonadal hormones, since these differences persisted in gonadectomized mice. Instead, these  
49 differences can be attributed to lower male expression of X-linked *Kdm6a* (UTX), an epigenetic  
50 regulator which escapes X inactivation in female NK cells. NK cell-specific UTX deletion in  
51 females phenocopied multiple features of male NK cells, which include increased numbers and  
52 reduced IFN- $\gamma$  production. Integrative ATAC-seq and RNA-seq analysis revealed a critical role  
53 for UTX in the regulation of chromatin accessibility and gene expression at loci important in NK  
54 cell homeostasis and effector function. Consequently, NK cell-intrinsic UTX levels are critical for  
55 optimal anti-viral immunity, since mice with NK cell-intrinsic UTX deficiency show increased  
56 lethality to mouse cytomegalovirus (MCMV) challenge. Taken together, these data implicate  
57 UTX as a critical molecular determinant of NK cell sex differences and suggest enhancing UTX  
58 function as a new strategy to boost endogenous NK cell anti-viral responses.

59

## 60 **Introduction**

61 Evolutionarily conserved sex differences exist in both innate and adaptive immune responses<sup>1,2</sup>.  
62 While males are less susceptible to autoimmunity, they also mount a limited anti-viral immune  
63 response compared to females<sup>3</sup>. For instance, males have a higher human cytomegalovirus  
64 (HCMV) burden after infection, suggesting increased susceptibility to viral threats<sup>4</sup>. This has  
65 also been recently illustrated with the COVID-19 pandemic, in which the strong male bias for  
66 severe disease has been postulated to reflect sex differences in immune responses<sup>5</sup>. Multiple  
67 studies in humans and mice have recently reported differences in immune cell distribution  
68 and/or function in males vs. females<sup>6-10</sup>. However, the molecular basis for these differences, and  
69 the mechanisms by which these differences influence disease outcomes, remain incompletely  
70 understood.

71 Sex differences in mammals are defined not only by divergent gonadal hormones, but  
72 also by sex chromosome dosage<sup>1</sup>. Expression of a subset of X-linked genes, for example, is  
73 higher in females (XX) than males (XY). While females undergo random X chromosome  
74 inactivation (XCI) to maintain similar levels of X-linked protein expression between sexes, XCI  
75 is incomplete, with 3-7% of X chromosome genes escaping inactivation in mice and 20-30%  
76 escaping inactivation in humans<sup>11</sup>. As such, differential levels of X-linked gene expression in  
77 females vs. males have been linked to sex differences in a wide range of conditions including  
78 neural tube defects<sup>12</sup> and autoimmune disease<sup>13</sup>.

79 As circulating type 1 innate lymphocytes, NK cells serve as an early line of defense  
80 against herpesvirus family members<sup>14</sup>. The importance of NK cells in anti-viral immunity is  
81 illustrated in patients with defective NK cell numbers or functionality, who are highly susceptible  
82 to infection by herpesviruses, such as HCMV and Epstein-Barr virus (EBV)<sup>15,16</sup>. Similarly, NK  
83 cells are required for the control of mouse cytomegalovirus (MCMV) and other viral infections<sup>17-</sup>  
84 <sup>19</sup>, as mice with either genetic deficiency in NK cell function or loss of NK cell numbers have a

85 significant increase in viral titers and mortality following MCMV infection<sup>20-25</sup>. Thus, NK cells are  
86 critical in anti-viral immunity across species.

87         Given this role for NK cells, it was therefore unexpected that NK cells are increased in  
88 virus-susceptible males<sup>6-10</sup>. Beyond NK cell numbers, other previously unappreciated sexually  
89 dimorphic NK cell feature(s) may instead account for sex differences with viral infections. Here,  
90 we show that NK cells in males are simultaneously expanded in number and deficient in effector  
91 function across mice and humans. These sex differences in NK cell composition and function  
92 are not completely due to hormonal differences, since these differences persisted in  
93 gonadectomized mice. Through expression screening, we identified the epigenetic regulator  
94 UTX (encoded by gene *Kdm6a*) as an XCI escapee that is expressed at significantly lower  
95 levels in male NK cells across mice and humans. Conditional ablation of UTX in female mouse  
96 NK cells, which mimics lower UTX expression in male NK cells, recapitulated NK cell  
97 phenotypes associated with male sex, such as increased NK cell numbers and lower production  
98 of IFN- $\gamma$ . Furthermore, parallel Assay for transposase-accessible chromatin using sequencing  
99 (ATAC-seq) and bulk RNA sequencing (RNA-seq) of WT and UTX<sup>NKD</sup> NK cells revealed a  
100 critical role for UTX in regulating chromatin accessibility and transcription of gene clusters  
101 involved in NK cell fitness (*Bcl2*) and effector response (*Ifng* and *Csf2*). Notably, UTX<sup>NKD</sup> mice  
102 had increased mortality in response to MCMV infection, suggesting a critical role for UTX in the  
103 production of optimal anti-viral effector responses. Ultimately, our findings demonstrate that  
104 divergent UTX levels underlie sex differences in NK cell homeostasis and effector function.  
105 Enhancing UTX function may therefore represent a novel strategy for optimizing NK cell-  
106 mediated anti-viral immunity.

107

108

109

110

## 111 **Results**

### 112 **NK cells display sexually dimorphic phenotypes independent of gonadal sex hormones.**

113 Due to the critical role of NK cells in anti-viral immunity and increased male susceptibility to  
114 cytomegalovirus (CMV) and other herpesvirus family infections<sup>4</sup>, it was surprising that multiple  
115 studies have reported that human males display increased NK cell numbers<sup>6-10</sup>. A recent  
116 investigation examining spleens of C57BL/6 mice also reported increased numbers of NK cells  
117 in males vs. females<sup>26</sup>. Consistent with this, our data show that splenic NK cells are increased in  
118 frequency (**Fig. 1a,b**) and absolute numbers (**Fig. 1c**) in male C57BL/6 mice compared to  
119 females. These findings suggest that other sexually dimorphic features beyond NK cell numbers  
120 may account for increased male susceptibility to viral infections. In response to viral infection,  
121 NK cells are critical for early production of proinflammatory cytokines, particularly IFN- $\gamma$ <sup>27</sup>. To  
122 test if sex differences exist in NK cell-intrinsic function, we compared effector cytokine  
123 production in NK cells from female vs. male mice *ex vivo*. Stimulation with IL-12 and IL-18,  
124 cytokines known to induce robust IFN- $\gamma$  production by NK cells<sup>28</sup>, resulted in lower IFN- $\gamma$   
125 production by male NK cells (**Fig. 1d-f**). Similarly, stimulation of activated human NK cells  
126 (TCR $\beta$ <sup>-</sup> CD3<sup>-</sup> CD56<sup>+</sup>) isolated from peripheral blood mononuclear cells (PBMCs) with IL-12 and  
127 K562 leukemia cells resulted in lower %IFN- $\gamma$ <sup>+</sup> (**Fig. 1g**) and IFN- $\gamma$  MFI (**Fig. 1h**) in male  
128 compared to female NK cells. Thus, while NK cell numbers are increased, male NK cell effector  
129 function is consistently reduced in both mice and humans.

130 Female or male sex is based on a composite of gonadal hormones (e.g., estrogens or  
131 androgens) and sex chromosomes (e.g., 46XX or 46XY)<sup>1</sup>. Previous studies demonstrated direct  
132 effects of gonadal hormones in regulation of IFN- $\gamma$  production by NK cells<sup>29</sup>, but it remains  
133 possible that NK cell sex differences can also be attributed to sex chromosome complement. To  
134 test this possibility, we gonadectomized mice to abolish the effect of sex hormones.  
135 Gonadectomy failed to eliminate sex differences in NK cell frequency (**Fig. 1i**), absolute  
136 numbers (**Fig. 1j**) and IFN- $\gamma$  protein production in response to cytokine stimulation (**Fig. 1k**),

137 indicating that gonadal hormones are not solely responsible for sex differences in NK cells.  
138 Thus, we hypothesized that chromosomal complement, in particular X chromosome dosage,  
139 may also play an important role.

140

#### 141 **X-linked UTX escapes X-inactivation and has higher expression in female NK cells.**

142 While 46XX females undergo X chromosome inactivation (XCI) to control dosages of X-linked  
143 genes, a subset of genes escapes XCI (termed XCI escapees), often resulting in higher  
144 expression in females compared to males. Thus, XCI escapees are prime candidates for  
145 mediating phenotypic sex differences in NK cells. Five genes (*XIST*, *DDX3X*, *KDM6A*, *EIF2S3*,  
146 *KDM5C*) have previously been identified as XCI escapees in both humans and mice<sup>30</sup>. *XIST*  
147 was excluded from further analysis because it is not expressed in male cells due to its known  
148 role in X chromosome inactivation in female cells<sup>1</sup>. All 4 remaining genes were significantly  
149 downregulated in male vs. female NK cells, from humans (**Fig. 2a**) and mice (**Fig. 2b**). The  
150 greatest differential expression in both human and mouse NK cells was seen with *Kdm6a* (also  
151 known as UTX) (**Fig. 2a,b**). Male NK cells also expressed lower UTX protein levels compared to  
152 female NK cells in mice (**Fig. 2c,d**). These data indicate that expression levels of *Kdm6a* (UTX)  
153 is sex-biased in NK cells.

154 In NK cells derived from gonadectomized mice, differences persisted in *Kdm6a*  
155 transcript levels (**Fig. 2e**) and UTX protein levels (**Fig. 2f**). Additionally, using the four core  
156 genotype (FCG) mouse model, which uncouples sex chromosome complement (XX or XY) and  
157 gonadal sex organ (ovaries or testes)<sup>31</sup>, *Kdm6a* transcript levels were also lower in mice with  
158 one X chromosome (XY) independent of gonadal composition (**Extended Data Fig. 2a**).  
159 Together these findings suggest that increased UTX expression in female mice is not due to  
160 hormonal effects and instead point to a primary role for X chromosome dosage.

161

162

163 **UTX deletion recapitulates male NK cell phenotypes of frequency and IFN- $\gamma$  production.**

164 To determine if UTX mediates sex differences in NK cells, we generated mice with a conditional  
165 deletion of UTX in NK cells (*Kdm6a*<sup>fl/fl</sup> x *Ncr1*<sup>Cre+</sup>, referred to as UTX<sup>NKD</sup> hereafter) with WT  
166 (*Kdm6a*<sup>fl/fl</sup> x *Ncr1*<sup>Cre-</sup>) littermates used as controls. To control for gonadal hormone and sex  
167 chromosome effects, comparisons were made only in female mice (female WT vs. female  
168 UTX<sup>NKD</sup> littermates). We confirmed decreased UTX protein expression in NK cells from UTX<sup>NKD</sup>  
169 mice using flow cytometry (**Extended Data Fig. 2b,c**). Similar to male mice, female UTX<sup>NKD</sup>  
170 mice displayed increased splenic NK cell frequency (**Fig. 3a,b**) and absolute numbers (**Fig. 3c**)  
171 in the spleen, blood, lungs, liver and bone marrow, demonstrating that this increase was not  
172 tissue specific. Furthermore, IFN- $\gamma$  protein production in response to IL-12 and IL-18 stimulation  
173 was decreased in NK cells from UTX<sup>NKD</sup> vs. WT mice (**Fig. 3d-f**). These results implicate UTX in  
174 limiting NK cell numbers and promoting IFN- $\gamma$  production, suggesting divergent UTX levels may  
175 play a causal role in NK cell sex differences.

176

177 **Global changes in NK cell chromatin accessibility and transcription mediated by UTX**

178 Recent studies have identified NK cell regulatory circuitry (regulomes) that prime innate  
179 lymphoid cells for swift effector responses even prior to NK cell activation<sup>32,33</sup>. As an epigenetic  
180 modifier, UTX can alter transcription by organizing chromatin at regulatory elements of target  
181 gene loci<sup>34</sup>. To investigate the UTX-mediated modifications on chromatin accessibility and gene  
182 expression in NK cells, we performed Assay for Transposase-Accessible Chromatin using  
183 sequencing (ATAC-seq) in tandem with bulk RNA sequencing (RNA-seq) on sort-purified WT  
184 (CD45.1<sup>+</sup>) and UTX<sup>NKD</sup> (CD45.2<sup>+</sup>) NK cells from WT:UTX<sup>NKD</sup> mixed bone marrow chimeras  
185 (mBMCs) (**Fig. 4a**). Using mBMCs allowed for an internally controlled experiment to minimize  
186 environmental confounding factors. Principle Component Analysis (PCA) of both ATAC-seq and  
187 RNA-seq data revealed that samples clustered together by genotype (**Fig. 4b**), indicating that

188 loss of UTX results in profound changes in both the chromatin landscape and transcriptome of  
189 NK cells. ATAC-seq revealed 3569 peaks decreased and 2113 peaks increased in accessibility  
190 in UTX<sup>NKD</sup> compared to WT NK cells (Log<sub>2</sub> Fold Change > ±0.5, adjusted p-value < 0.05, FDR <  
191 0.05) (**Supplementary Table 1**). Moreover, RNA-seq identified 577 decreased and 377  
192 increased genes in UTX<sup>NKD</sup> vs. WT (Log<sub>2</sub> Fold Change > ± 0.5, adjusted p-value < 0.05, FDR <  
193 0.05) (**Supplementary Table 2**). Thus, these data suggest UTX plays an active role in  
194 controlling the NK regulome at baseline.

195 Integrative analysis of ATAC-seq and RNA-seq identified 400 genes that are both  
196 differentially accessible and expressed with a significant positive correlation (Spearman  
197 correlation: R = 0.62, p < 2.2x10<sup>-16</sup>) between the mean log<sub>2</sub> fold change of ATAC-seq peaks and  
198 log<sub>2</sub> fold change of RNA-seq expression (**Extended Data Fig. 3a**). Fuzzy c-means clustering<sup>35</sup>  
199 of both the ATAC-seq and RNA-seq datasets identified six major clusters which were  
200 significantly decreased (Clusters 1, 2, 3, and 6) or increased (Clusters 4 and 5) in accessibility  
201 (**Fig. 4c**) and expression (**Fig. 4d**) in UTX<sup>NKD</sup> NK cells. For functional enrichment analysis,  
202 g:Profiler<sup>36</sup> was used to analyze clusters of differentially expressed genes identified by RNA-seq  
203 (**Fig. 4e**). Major pathways such as immune system process, cytokine production, IFN-γ  
204 production, lymphocyte activation, and immune effector process were associated with  
205 decreased expression in UTX<sup>NKD</sup> (Clusters 1, 2, 3, and 6) (**Fig. 4e**). At the same time, pathways  
206 such as developmental process, biosynthetic process, and metabolic process were significantly  
207 associated with increased expression in UTX<sup>NKD</sup> (Clusters 4 and 5) (**Fig. 4e**). Collectively, these  
208 findings implicate UTX in the coordinate regulation of genes associated with NK cell  
209 homeostasis and effector function.

210 Furthermore, UTX is known to interact with transcription factors (TFs) to coordinate  
211 target gene transcription<sup>34</sup>. To identify putative UTX TF partners, we performed HOMER  
212 (Hypergeometric Optimization of Motif Enrichment)<sup>37</sup> TF motif analysis on each cluster of



213 significant differentially accessible peaks (**Fig. 4f**). TFs associated with modulating effector  
214 function during viral infection such as Runt (Runx1 and Runx2)<sup>38</sup> and T-box (Eomes, T-bet, Tbr1  
215 and Tbx6)<sup>39</sup> family TFs were more significant and had a higher percentage of target motifs  
216 associated with clusters displaying decreased accessibility in UTX<sup>NKD</sup> (Clusters 1, 2, 3, and 6)  
217 (**Fig. 4f**). Conversely, TFs associated with proliferation, differentiation, and metabolism in the  
218 zinc finger family TFs (KLF1, KLF5, KLF6, KLF14, Sp2 and Sp5)<sup>40</sup> were more significantly  
219 associated with clusters displaying increased accessibility (Clusters 4 and 5) (**Fig. 4f**). These  
220 data suggest that UTX poises the chromatin accessibility of several genes at steady state  
221 known to influence NK cell fitness and effector responses, while also controlling genome-wide  
222 accessibility of transcription factor binding sites implicated in these processes.

223

224 **UTX coordinately regulates chromatin accessibility and expression of apoptosis pathway**  
225 **genes.**

226 The observed expansion of NK cell numbers in UTX<sup>NKD</sup> mice (**Fig. 3a-c**) could either be due to  
227 higher NK cell proliferation or increased resistance to apoptosis. However, UTX<sup>NKD</sup> NK cells  
228 paradoxically displayed a lower proportion of cells expressing the cell division marker Ki67  
229 (**Extended Data Fig. 4a**). UTX<sup>NKD</sup> NK cells also showed less CFSE dilution in response to IL-15,  
230 a cytokine known to induce NK cell proliferation (**Extended Data Fig. 4b,c**). Thus, these results  
231 suggest that higher NK cell numbers observed in UTX<sup>NKD</sup> mice were not due to increased  
232 proliferation. In contrast, increased survival is likely the cause of expanded NK cell numbers in  
233 UTX<sup>NKD</sup> mice.

234 Among the differentially accessible and expressed genes in NK cells lacking UTX were  
235 those important in controlling apoptosis. An anti-apoptotic gene, *Bcl2*, showed increased  
236 accessibility and expression in UTX<sup>NKD</sup> vs. WT NK cells (**Fig.5a, Extended Data Fig. 3b**).

237 Previous studies in mice have demonstrated that Bcl-2 can inhibit the pro-apoptotic function of

238 Bim to promote NK cell survival<sup>41</sup>, thus, we interrogated the expression of these proteins in  
239 UTX<sup>NKD</sup> NK cells. While naïve UTX<sup>NKD</sup> NK cells showed increased intracellular protein  
240 expression of Bcl-2 compared to WT NK cells (**Fig. 5b,d**), UTX-deficient NK cells also displayed  
241 a modest increase in intracellular Bim levels (**Fig. 5c,e**). Importantly, the Bcl-2:Bim ratio was  
242 significantly higher in UTX<sup>NKD</sup> NK cells (**Fig. 5f**), suggesting UTX-deficiency likely results in a  
243 higher proportion of pro-survival proteins present in NK cells. Notably, male NK cells also  
244 displayed a significant increase in Bcl-2:Bim ratio, which may underlie the expanded NK cell  
245 numbers observed in male mice (**Fig. 5g**). These results implicate UTX in regulation of NK cell  
246 fitness to restrict numbers at homeostasis.

247

#### 248 **UTX is critical for NK cell IFN- $\gamma$ production and effector function.**

249 Since NK cells are early responders to MCMV, rapid effector molecule production is critical for  
250 NK cell mediated anti-viral control. ATAC-seq and RNA-seq of NK cells from WT:UTX<sup>NKD</sup>  
251 mBMCs identified various chromatin accessibility and transcript changes at steady state (**Fig.**  
252 **4b,c**). Specifically, genes involved in the NK effector response (*Ifng* and *Csf2*)<sup>27,42</sup> showed  
253 decreased accessibility and expression in UTX<sup>NKD</sup> compared to WT NK cells (**Fig. 6a, Extended**  
254 **data fig. 3b-d**). Moreover, qRT-PCR verified decreases in *Ifng* transcript levels in UTX<sup>NKD</sup> vs.  
255 WT NK cells at rest (**Fig. 6b**). Similarly, male NK cells, which express lower levels of UTX  
256 (**Fig.2c,d**), also had a similar decrease in *Ifng* transcript levels at rest (**Fig. 6c**). Thus, through  
257 shaping of the chromatin landscape, UTX controls levels of effector gene transcripts available  
258 prior to immune challenge.

259 To determine whether UTX deficiency also led to decreased chromatin accessibility and  
260 transcription of effector genes in NK cells during infection, we performed ATAC-seq on NK cells  
261 isolated from MCMV-infected WT:UTX<sup>NKD</sup> mBMCs on D1.5 post-infection (PI). Similar to naïve  
262 UTX-deficient NK cells, D1.5 PI UTX<sup>NKD</sup> NK cells also showed decreased chromatin accessibility

263 at the *Irf1* and *Csf2* loci (**Fig. 6d,e, Extended Data Fig. 3e,f**). qRT-PCR confirmed decreased  
264 *Irf1* and *Csf2* transcripts in NK cells from UTX<sup>NKD</sup> mice at D1.5 PI (**Fig. 6f**). Similarly, UTX<sup>NKD</sup>  
265 NK cells showed decreased IFN- $\gamma$  protein expression in UTX<sup>NKD</sup> NK cells on D1.5 PI indicating  
266 that UTX expression in NK cells is required for optimal IFN- $\gamma$  production following viral infection  
267 (**Fig. 6g,h**). To confirm whether dosage of UTX expression in mature NK cells associates with  
268 NK cell production of IFN- $\gamma$  during viral infection, we generated transgenic mice to achieve  
269 tamoxifen-inducible UTX deletion (*Rosa26*<sup>ERT2CRE/+</sup> x *Kdm6a*<sup>fl/fl</sup>: iUTX<sup>-/-</sup>). Tamoxifen  
270 administration in WT:iUTX<sup>-/-</sup> mBMCs resulted in differential degrees of UTX protein loss, and  
271 displayed a positive correlation between intracellular UTX levels and IFN- $\gamma$  production on D1.5  
272 PI (**Extended Data Fig. 5**). Since IFN- $\gamma$  production by NK cells is critical for protection against  
273 MCMV<sup>27</sup>, we challenged WT and UTX<sup>NKD</sup> mice with a sublethal dose of MCMV and monitored  
274 survival. While WT mice controlled MCMV infection (n = 8/8 survived), UTX<sup>NKD</sup> mice rapidly  
275 succumbed to infection (n = 3/8 survived) (**Fig. 6i**). These results demonstrate a requirement for  
276 NK cell-intrinsic UTX in the control of effector molecule production and protection against  
277 MCMV infection.

278

279

280

281

282

283

284

285

## 286 Discussion

287 Sex is a critical biological variable in determining outcomes to viral infections<sup>3</sup>. This was recently  
288 illustrated with COVID-19, in which male sex was identified as a major risk factor for severe  
289 disease<sup>5</sup>. Moreover, recent studies have linked NK cell dysfunction within severe COVID-19  
290 disease<sup>43</sup>. Given the importance of NK cells in anti-viral immunity, understanding the root  
291 causes of sex differences in NK cell biology will have far-reaching implications in optimizing anti-  
292 viral immunity. In this study, we demonstrated that lower expression of UTX in XX UTX<sup>NKD</sup> NK  
293 cells mimics levels in XY NK cells, which may contribute to increased NK cell numbers and  
294 decreased IFN- $\gamma$  production in males (**Extended Data Fig. 6a**). UTX is expressed at lower  
295 levels in male NK cells across mice and human and this observation is independent of gonadal  
296 hormones in mice. NK cell UTX is required for controlling NK cell fitness, modulating  
297 accessibility of transcription factor binding motifs, increasing chromatin accessibility at effector  
298 gene loci, and poising NK cells for rapid response to virus infection (**Extended Data Fig. 6b**).  
299 Together, these findings support a model in which divergent UTX expression contributes to sex  
300 differences in NK cell numbers and effector function.

301 Our findings indicate that UTX restricts NK cell numbers at steady state, since NK cells  
302 are increased at baseline in UTX<sup>NKD</sup> mice. This is in contrast to UTX deficiency in other immune  
303 cell types, which have been reported to result in moderate (CD8<sup>+</sup> and CD4<sup>+</sup> T cells) or severe  
304 (iNKT) decreases in peripheral cell numbers<sup>44-46</sup>. Interestingly, T cell-specific UTX-deficiency is  
305 associated with CD8<sup>+</sup> T cell accumulation during viral infection. Thus, it is possible that UTX-  
306 mediated gene programs that inhibit CD8<sup>+</sup> T cell numbers during inflammation are shared by NK  
307 cells at rest<sup>46</sup>. Indeed, increased Bcl-2 levels were observed in both UTX-deficient NK cells and  
308 UTX-deficient CD8<sup>+</sup> T cells, suggesting that UTX down-regulates this anti-apoptotic factor in  
309 both innate and adaptive cytotoxic lymphocytes.

310 NK cell-mediated effector functions during viral infection include cytokine production  
311 (IFN- $\gamma$ ) and cytotoxic molecule expression<sup>47</sup>. Our results from simultaneous ATAC-seq and

312 RNA-seq suggest that UTX poises the chromatin landscape of NK cells at rest to quickly  
313 respond to viral challenge by increasing accessibility and transcription of effector loci such as  
314 *Irfng* and *Csf2* prior to viral infection<sup>27,42</sup>. Decreased IFN- $\gamma$  protein levels were seen at D1.5 post  
315 MCMV-infection in UTX-deficient NK cells, suggesting decreased effector functionality during  
316 inflammation. These results support a previous study that suggests the existence of an NK cell  
317 regulome<sup>27,42</sup>, in which NK cell chromatin accessibility is actively maintained at steady-state and  
318 demonstrates a critical role for UTX in its maintenance before and during inflammation.

319 As a histone demethylase, UTX has intrinsic catalytic ability to demethylate H3K27me3  
320 (a repressive histone mark) to poise chromatin for active gene expression<sup>48</sup>. In addition to its  
321 catalytic activity, UTX functions in multiprotein complexes with other epigenetic regulators (e.g.  
322 SWI/SNF, MLL4/5 and p300) to mediate chromatin remodeling in a demethylase-independent  
323 manner<sup>48,49</sup>. In CD8<sup>+</sup> T cells, UTX binds to enhancer and TSS of effector genes to promote  
324 effector gene programs in a demethylase-independent manner<sup>46</sup>. In contrast, demethylase  
325 activity in iNKT cells is required for the development and function and H3K27 methylation  
326 correlated with gene programs important for CD4<sup>+</sup> T follicular helper cell development<sup>44,50</sup>. Thus,  
327 the molecular mechanisms by which UTX functions appears to be immune cell specific. A  
328 previous study treated human NK cells with a small molecule inhibitor of H3K27me3  
329 demethylases (GSK-J4) and found reduced cytokine expression (IFN- $\gamma$ , TNF- $\alpha$ , GM-CSF, and  
330 IL-10) in response to *in vitro* stimulation<sup>51</sup>. However, GSK-J4 is not a specific tool for studying  
331 UTX-mediated mechanisms because it also inhibits Jmjd3, another H3K27me3 demethylase as  
332 well as having non-specific effects on other histone demethylases<sup>52</sup>. Thus, further studies using  
333 more precise genetic modification strategies are needed to understand the mechanisms by  
334 which UTX functions in NK cells.

335 UTX has been reported to interact with lineage specific TFs in T cells to target particular  
336 effector loci<sup>34</sup>. Our studies using HOMER motif analysis revealed potential interactions between

337 UTX and TFs associated with modulating NK cell effector function during viral infection (Runx1,  
338 Runx2, Eomes, T-bet, Tbr1, and Tbx6). Moreover, these analyses also point to UTX interactions  
339 with TFs associated with NK cell proliferation, differentiation, and metabolism (KLF1, KLF5,  
340 KLF6, KLF14, Sp2 and Sp5). In line with a physiologic role for TFs in UTX-mediated control of  
341 chromatin accessibility, TF binding motifs were strongly enriched in ATAC-seq gene clusters.  
342 Further studies will be needed to experimentally verify these interactions in mouse and human  
343 NK cells.

344 NK cells are critical for control of HCMV infection in humans because NK cell-deficient  
345 individuals develop disseminated herpesvirus infections<sup>16,53</sup>. Sex differences in immune  
346 response to multiple viruses have been reported, including immune responses to HCMV<sup>53</sup>. Our  
347 data support a model in which sex differences in anti-viral immunity can partially be explained  
348 by differences in UTX expression in NK cells, given the increased susceptibility of UTX<sup>NKD</sup> mice  
349 to MCMV challenge. UTX deficiency has also been associated with Kabuki Syndrome and  
350 Turner Syndrome<sup>44,54</sup>, two human conditions associated with immune dysregulation and  
351 increased infections. Our findings suggest the possibility that UTX deficiency in human NK cells  
352 may contribute to decreased viral immunosurveillance observed in these patients, although  
353 future work will be needed to support this hypothesis.

354 Weighing factors that define patient subsets with different immune responses will allow  
355 us to move past a “one-size-fits-all” therapeutic approach to a precision medicine paradigm.  
356 Understanding sex differences in NK cell function and their molecular underpinnings is an  
357 important step toward incorporating sex as a biological factor in treatment decisions. In males  
358 with severe viral illness, for instance, enhancing NK cell UTX activity may provide therapeutic  
359 benefit. We expect that these insights will be important not only in the setting of viral infections,  
360 but also in other infections and cancer, where NK cells also play an important role. These

361 findings may also have important implications for adoptive cellular therapies, in which NK cells  
362 are the subject of intense interest<sup>55,56</sup>.

363

### 364 **Acknowledgements**

365 We thank members of the O'Sullivan and Su labs for helpful discussion. We thank the UCLA  
366 Technology Center for Genomics and Bioinformatics for RNA sequencing library preparation  
367 and the Cedars Sinai Applied Genomics, Computation, and Translational Core Facility for ATAC  
368 sequencing library preparation. T.E.O. is supported by the NIH (AI145997) and UC CRCC  
369 (CRN-20-637105). M.A.S. is supported by the NIH (NS107851, AI143894, DK119445)  
370 Department of Defense (USAMRAA PR200530), and National Organization of Rare Diseases.  
371 M.I.C. is supported by Ruth L. Kirschstein National Research Service Awards (GM007185 and  
372 AI007323), and Whitcome Fellowship from the Molecular Biology Institute at UCLA. L.R. is  
373 supported by the Warsaw fellowship from the MIMG department at UCLA. J.H.L. is supported  
374 by the NIH NIAMS (T32AR071307). A.P.A. is supported by NIH HD100298.

375

### 376 **Author Contributions**

377 M.I.C., L.R., J.H.L., R.Y.T., H.H., A.P.A., T.E.O. and M.A.S. designed the study; M.I.C., J.H.L.,  
378 R.Y.T., L.R., and S.C. performed the experiments; M.I.C., R.T.Y., F.M., and M.P. performed  
379 bioinformatics analysis; M.A.S, M.I.C. and T.E.O. wrote the manuscript.

380

### 381 **Competing Interests Statement**

382 T.E.O. is a scientific advisor for Xyphos Inc., a company that has financial interest in human NK  
383 cell-based therapeutics.

## Figure 1

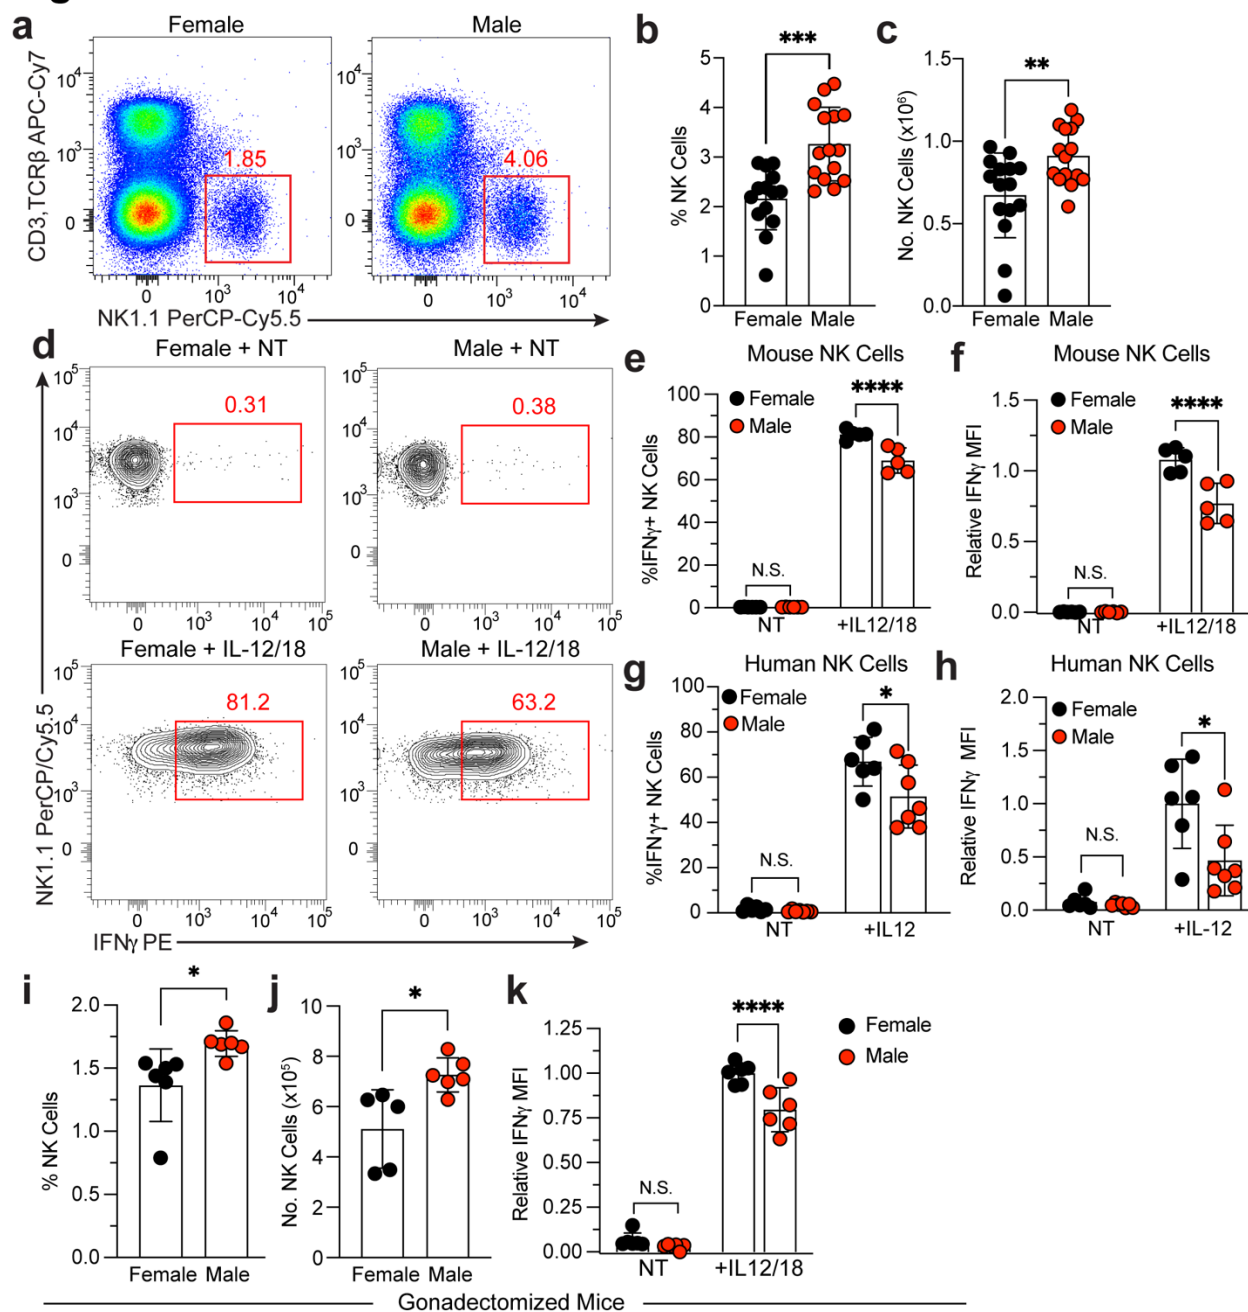

384

385 **Figure 1: Sex differences in IFN- $\gamma$  production and NK cell numbers in mouse and human**  
 386 **NK cells are independent of gonadal hormones. a)** Representative dot plots, **b)** percentage,  
 387 and **c)** absolute numbers of splenic NK cells (CD3 $^+$  TCR $\beta^+$  NK1.1 $^+$ ) in female and male C57BL/6  
 388 mice (n = 15 per group). **d)** Representative contour plots, and bar graphs depicting **e)**  
 389 percentages IFN- $\gamma^+$  and **f)** relative IFN- $\gamma$  mean fluorescence intensity (MFI) of total NK cells with



390 no treatment (NT) or in response to IL-12 (20 ng/ml) and IL-18 (10 ng/ml) stimulation of splenic  
391 NK cells from female vs. male mice for 5 hours *ex vivo* (n = 5 per group, data representative of  
392 2 independent experiments, normalized to female IL-12/18 treatment). **(g-h)** Human NK cells  
393 isolated from peripheral blood of female (n = 6) and male (n = 7) donors were cultured and  
394 stimulated with 10 ng/ml of IL-12 for 16 hours in the presence of K562 cells. **(g)** Percentage of  
395 IFN- $\gamma$ <sup>+</sup> NK cells, and **(h)** relative MFI of IFN- $\gamma$  in TCR $\beta$ <sup>-</sup>CD3<sup>-</sup>CD56<sup>+</sup> female and male human NK  
396 cells (normalized to female IL-12 treatment). **(i)** Frequency and **(j)** absolute numbers of splenic  
397 NK cells identified in gonadectomized mice (n = 6 per group). **(k)** IFN- $\gamma$  MFI of total splenic NK  
398 cells isolated gonadectomized female and male mice stimulated with IL-12 (20 ng/ml) and IL-18  
399 (10 ng/ml) for 5 hours *ex vivo* (n = 6 per group). Samples were compared using two-tailed  
400 Student's t test and data points are presented as individual mice with the mean  $\pm$  SEM (N.S.,  
401 Not Significant; \*, p <0.05; \*\*, p <0.01; \*\*\*, p <0.001; \*\*\*\*, p <0.0001).

402

403

## Figure 2

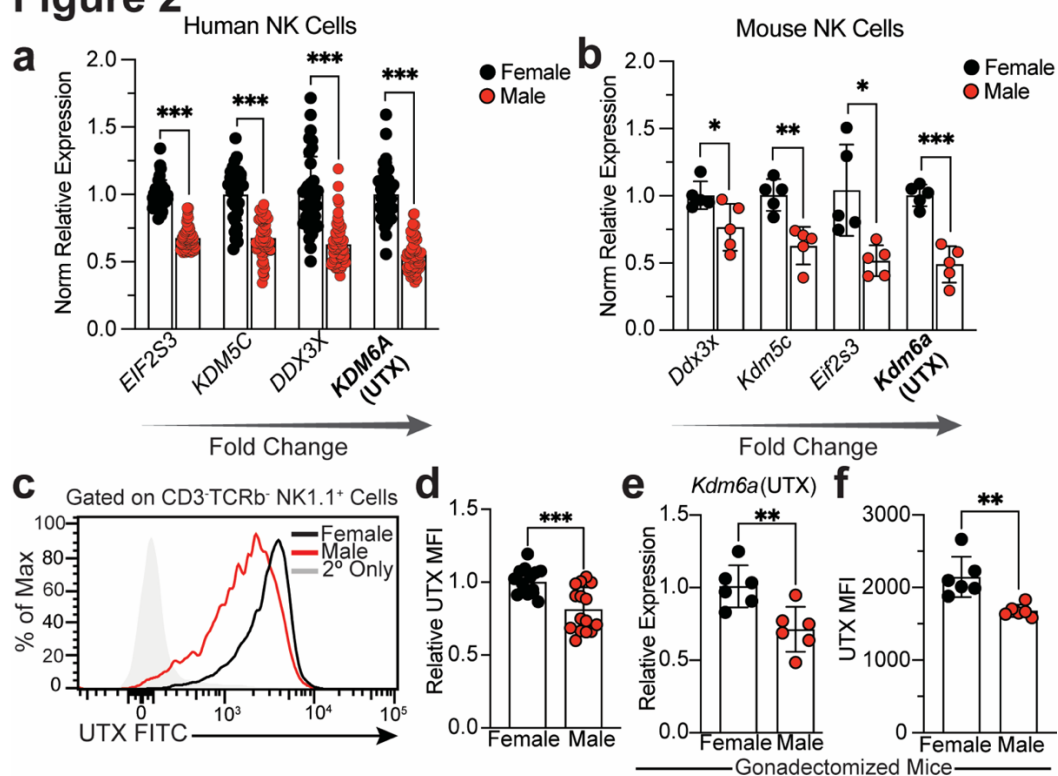

404

405 **Figure 2: X-linked UTX displays sexually dimorphic gene expression independent of sex**

406 **hormones. a)** Relative expression of X-chromosome inactivation escapee genes using DICE

407 database which performed RNA-seq on sorted NK cells from human females (n = 36) vs. males

408 (n = 54) normalized to female. **b)** Relative expression of X chromosome inactivation escapee

409 genes by RT-qPCR in NK cells from female vs. male mice (C57BL/6; 8 week old, n = 5 per

410 group). Genes are ordered by increasing fold change. **c)** Representative histogram and **b)**

411 relative MFI of UTX protein expression in splenic NK cells from naïve female vs. male mice by

412 flow cytometry (C57BL/6; 8 week old). **e)** Relative expression of *Kdm6a* (UTX) by RT-qPCR of

413 isolated splenic NK cells normalized to female and **f)** UTX MFI of NK cells by flow cytometry

414 from spleens of gonadectomized female (ovariectomized) and male (castrated) mice (n = 6 per

415 group). Samples were compared using two-tailed Student's t test and data points are presented

416 as individual mice with the mean ± SEM (\*, p < 0.05; \*\*, p < 0.01; \*\*\*, p < 0.001).

### Figure 3

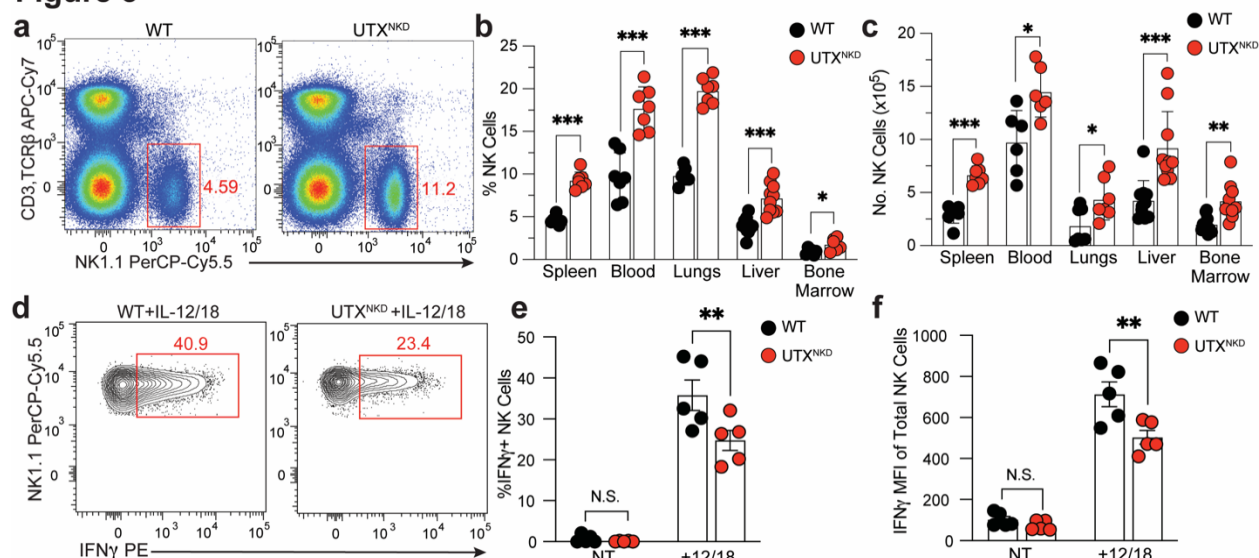

417

### 418 **Figure 3: UTX regulates NK cell numbers and IFN-γ expression in NK cells. a)**

419 Representative flow cytometry dot plots of splenocytes from WT and UTX<sup>NKD</sup> mice, gated on NK

420 cells (CD3<sup>-</sup>,TCRβ<sup>-</sup>NK1.1<sup>+</sup>). **b)** Percentage and **c)** absolute numbers of NK cells isolated from the

421 spleen, blood, lungs, liver, and bone marrow of WT and UTX<sup>NKD</sup> mice (n = 6-10 per group).

422 Numbers represent (spleen, lungs and liver – entire organ), (blood - per 1 ml of blood), and

423 (Bone Marrow - 2 femurs per mouse). **d)** Representative contour plots, **e)** frequency, and **f)** MFI

424 of IFN-γ of total NK cells in response to IL-12 (20 ng/ml) and IL-18 (10 ng/ml) stimulation of

425 splenic NK cells from WT and UTX<sup>NKD</sup> mice for 5 hours *ex vivo* (n = 5 per group). Data are

426 representative of 2-4 independent experiments. Samples were compared using two-tailed

427 Student's t test and data points are presented as individual mice with the mean ± SEM (N.S.,

428 Not Significant; \*, p <0.05; \*\*, p <0.01; \*\*\*, p<0.001).

429

430

431

432

## Figure 4

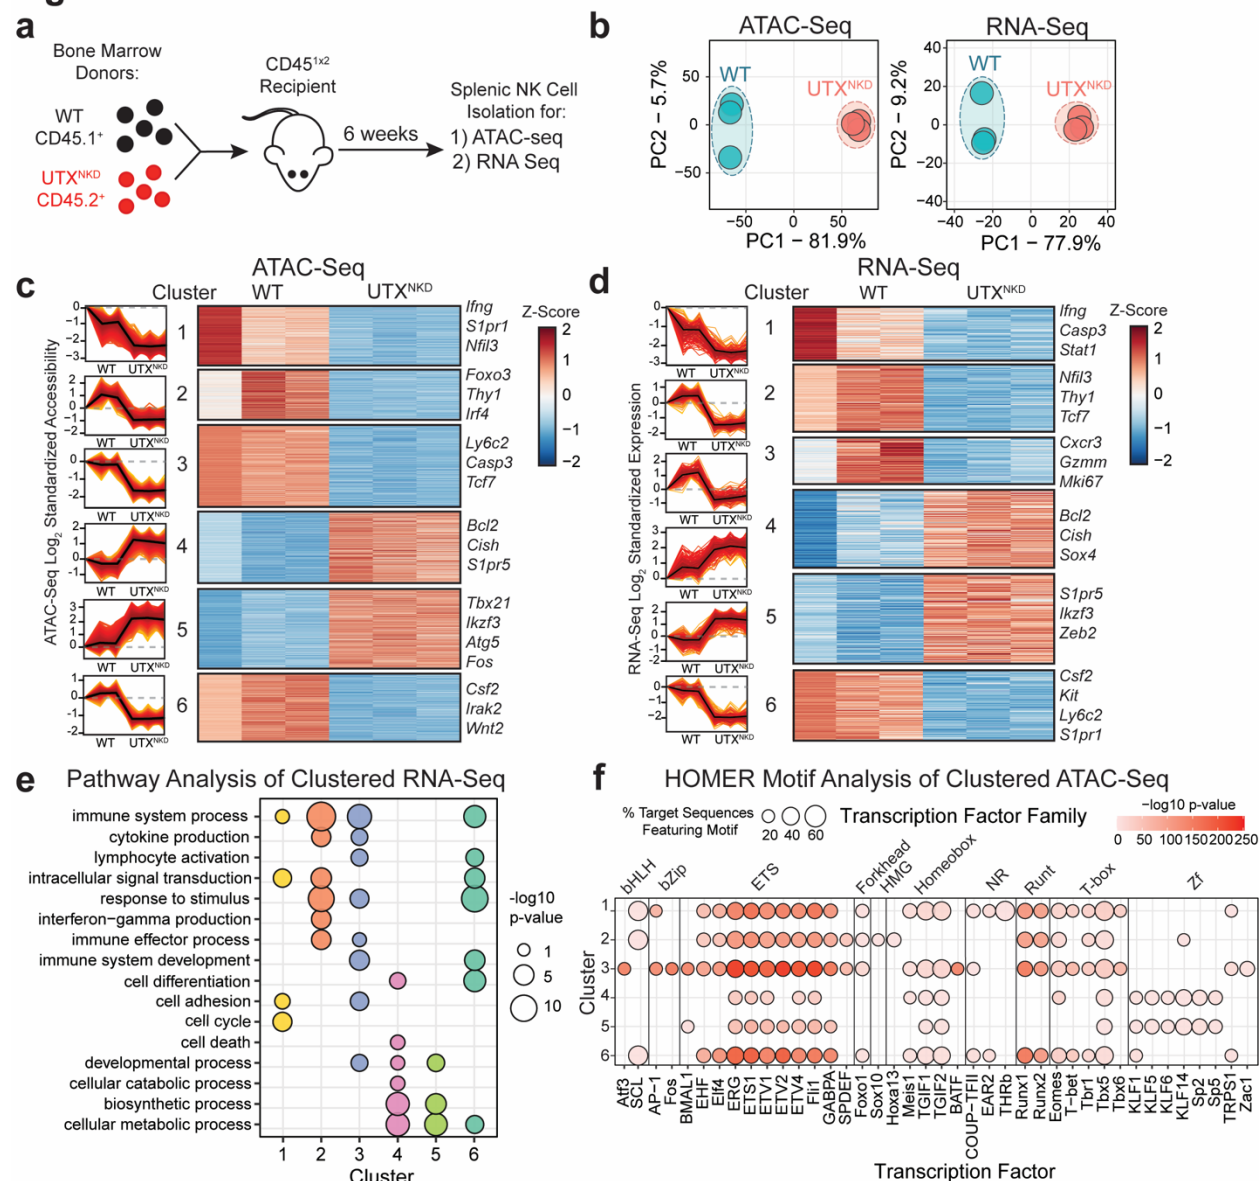

433

434 **Figure 4: Global changes in NK cell chromatin accessibility and transcription mediated**

435 **by UTX.** **a)** Schematic of mixed bone marrow chimeras (mBMCs) produced by transferring cells

436 from WT (CD45.1<sup>+</sup>) and UTX<sup>NKD</sup> (CD45.2<sup>+</sup>) bone marrow donors into a lymphodepleted host

437 (CD45<sup>1x2</sup>) and allowed to reconstitute for 6 weeks. Then NK cells were sorted from spleens of

438 mBMCs for ATAC-seq and RNA-seq library preparation. **b)** Principal component analysis (PCA)

439 of chromatin accessibility (ATAC-seq) and transcriptional (RNA-seq) changes in WT and

440 UTX<sup>NKD</sup> NK cells at steady state. **c,d)** Line graphs (left) and heatmap (right) of fuzzy c-means

441 clustered differentially **c)** accessible peaks identified by ATAC-seq and **d)** expressed genes  
442 identified by RNA-seq of splenic NK cells from WT:UTX<sup>NKD</sup> mBMCs (adjusted p-value < 0.05  
443 and membership score > 0.5). Line graphs show mean (black line) and standard deviation (red  
444 ribbon) of mean-centered normalized log<sub>2</sub> values of significant (FDR and adjusted p-value <  
445 0.05) **c)** peaks of accessibility by ATAC-seq and **d)** gene expression by RNA-seq. **e)** Pathway  
446 analysis of significant fuzzy c-means clustered RNA-seq genes using g:Profiler with point size  
447 indicating -log<sub>10</sub>(p-value). **f)** HOMER motif analysis of significant fuzzy c-means clustered  
448 ATAC-seq peaks grouped by transcription factor family (top) and transcription factor (bottom).  
449 Point size indicates percentage of target sequences featuring motif and red gradient indicates -  
450 log<sub>10</sub>(p-value) of enrichment. All genes displayed in heatmaps met the following threshold of  
451 significance: FDR < 0.05, p < 0.05, and Log<sub>2</sub>FC > 0.5.

452

453

454

455

## Figure 5

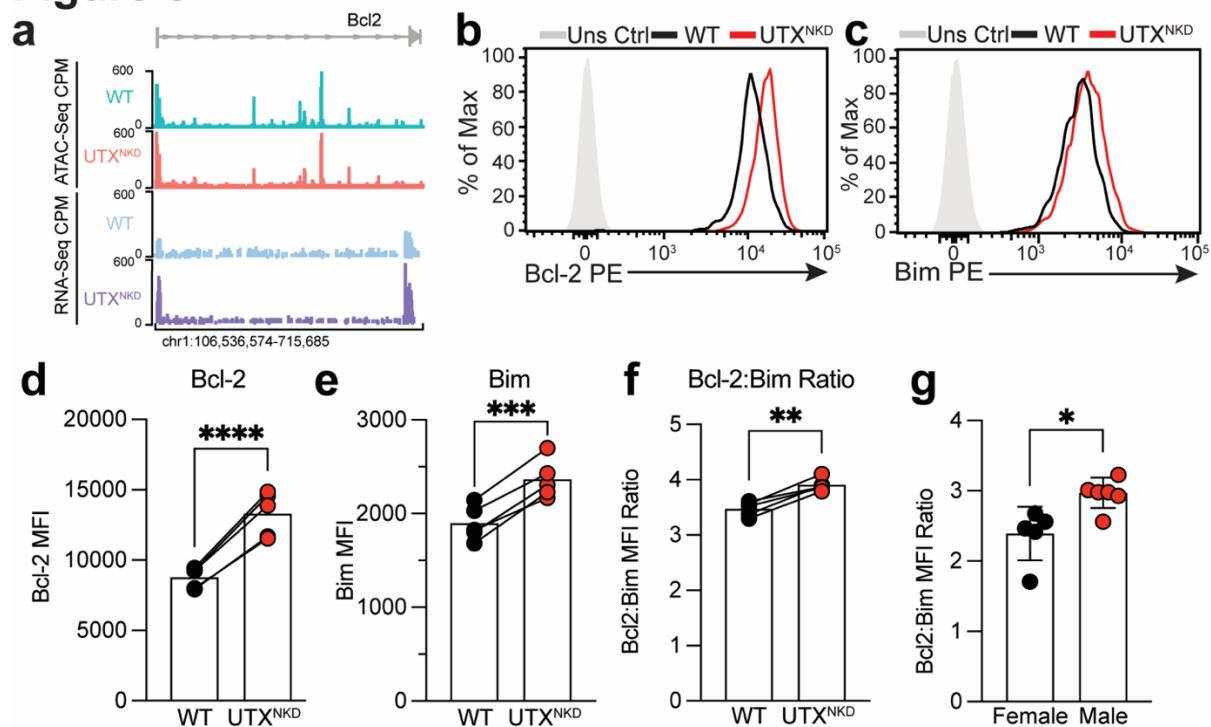

456

457 **Figure 5: UTX regulates genes involved in apoptosis in NK cells through chromatin**  
 458 **remodeling.** **a**) Representative tracks of ATAC-seq signal (WT: green and UTX<sup>NKD</sup>: red) and  
 459 RNA-seq transcript signal (WT: blue and UTX<sup>NKD</sup>: purple) of *Bcl2* in NK cells isolated at rest  
 460 from WT:UTX<sup>NKD</sup> mBMCs. Representative histogram of **b**) Bcl-2 and **c**) Bim protein expression,  
 461 MFI of **d**) Bcl-2, **e**) Bim, and **f**) Bcl2:Bim ratio from flow cytometric analysis of total peripheral  
 462 blood NK cells (CD3<sup>+</sup>TCRβ<sup>-</sup>NK1.1<sup>+</sup>) from WT:UTX<sup>NKD</sup> mBMCs (n = 4). **g**) Bcl2:Bim MFI ratio of  
 463 total splenic NK cells (CD3<sup>+</sup>TCRβ<sup>-</sup>NK1.1<sup>+</sup>) from gonadectomized female and male mice (n = 6  
 464 per group). Data represent 2-3 independent experiments. Samples were compared using two-  
 465 tailed Student's t test and data points are presented as individual mice with the mean ± SEM (\*,  
 466 p < 0.05; \*\*, p < 0.01; \*\*\*, p < 0.001; \*\*\*\*, p < 0.0001).

## Figure 6

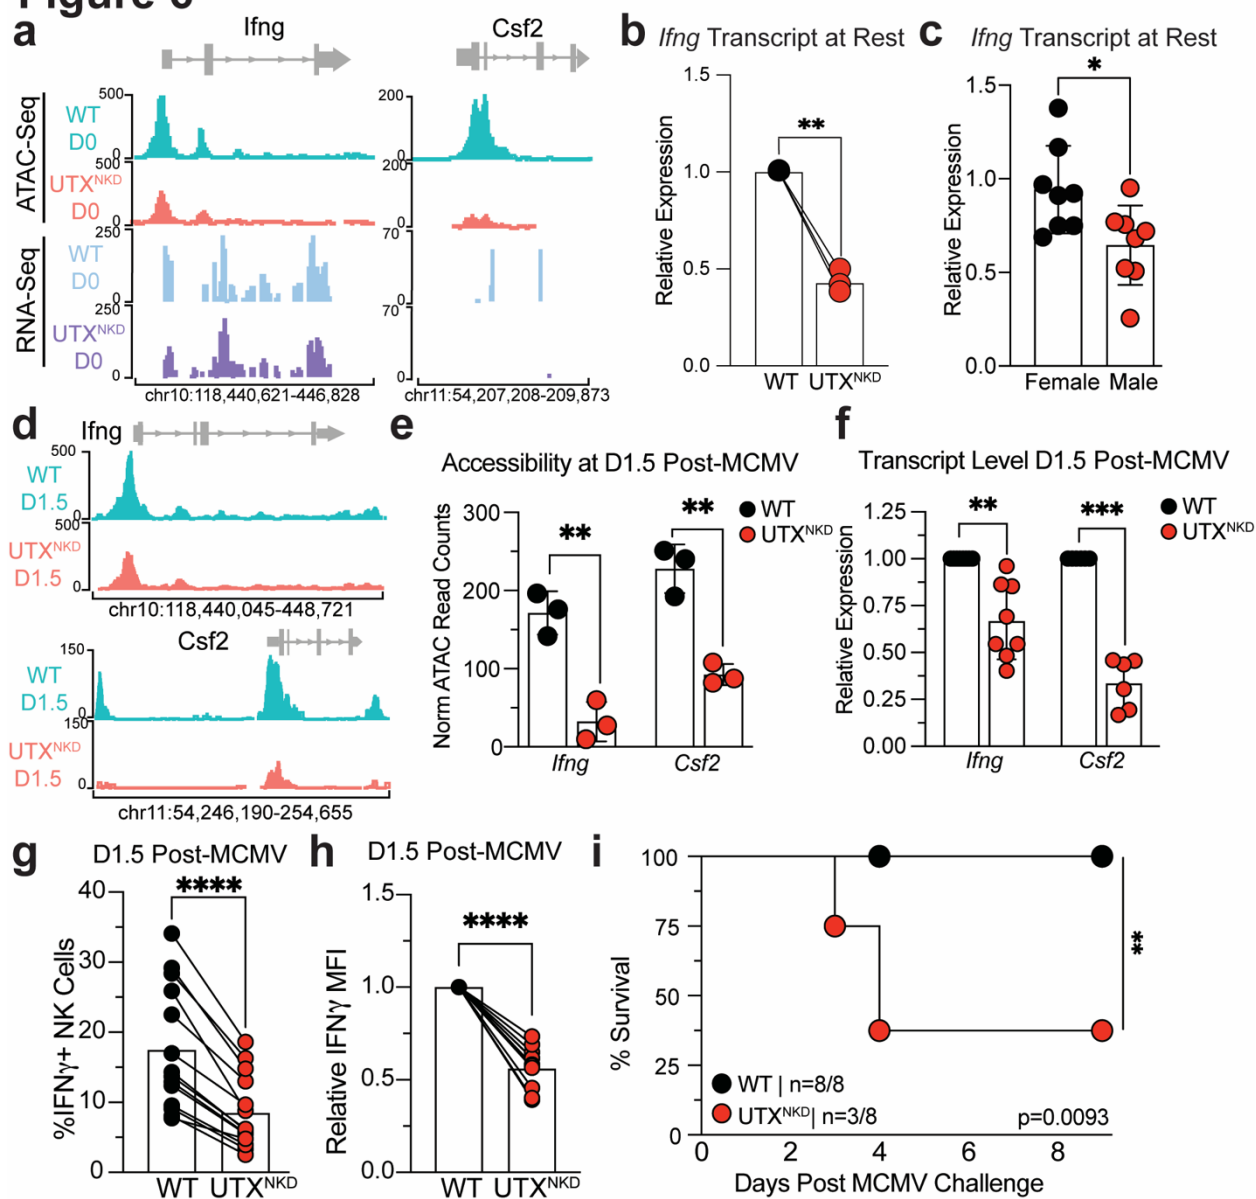

467

468 **Figure 6: UTX controls the expression of effector genes critical for NK cell-mediated anti-**

469 **viral immunity. a)** Representative tracks of ATAC-seq signal (WT: green and UTX<sup>NKD</sup>: red) and

470 RNA-seq transcript signal (WT: blue and UTX<sup>NKD</sup>: purple) of genes involved in NK effector

471 function (*Ifng* and *Csf2*) in NK cells isolated at rest (D0) from WT:UTX<sup>NKD</sup> mBMCs. **b)** Relative

472 expression of *Ifng* by RT-qPCR of isolated splenic NK cells normalized to WT from WT:UTX<sup>NKD</sup>

473 mBMCs (n = 3). **c)** Relative expression of *Ifng* transcripts by RT-qPCR in NK cells from female

474 vs. male mice normalized to female mice (C57BL/6; 8 week old, n = 8 per group). **d)**

475 Representative tracks of ATAC-seq signal (WT: green and UTX<sup>NKD</sup>: red) of genes involved in NK  
476 effector function (*Irfng* and *Csf2*) in NK cells isolated at from WT:UTX<sup>NKD</sup> mBMCs at D1.5 post-  
477 MCMV infection. **e**) Normalized read counts of accessibility at a representative peak located in  
478 the *Irfng* and *Csf2* loci at D1.5 post-MCMV infection of WT:UTX<sup>NKD</sup> mBMCs (n = 3). **f**) Expression  
479 by RT-qPCR of *Irfng* and *Csf2* transcript levels at D1.5 post-MCMV infection of WT:UTX<sup>NKD</sup>  
480 mBMCs relative to WT (n = 6-8). Flow cytometric analysis of **g**) percent IFN- $\gamma$ <sup>+</sup> and **h**)  
481 normalized IFN- $\gamma$  MFI relative to WT in splenic NK cells at D1.5 Post MCMV infection of  
482 WT:UTX<sup>NKD</sup> mBMCs (n = 14).**i**) Kaplan-Meier survival curves of WT and UTX<sup>NKD</sup> mice infected  
483 with MCMV (n = 8 per genotype). Mantel-Cox test (\*\*, p=0.0093). Data are representative of 2-3  
484 independent experiments. Two-tailed paired Student's t-test was performed, and data points  
485 depict individual mice with the mean  $\pm$  SEM (\*, p <0.05; \*\*, p <0.01; \*\*\*, p<0.001; \*\*\*\*,  
486 p<0.0001).

487

488

489

490

491

492

493

494

495

496

497

498



## Extended Data Figure 1

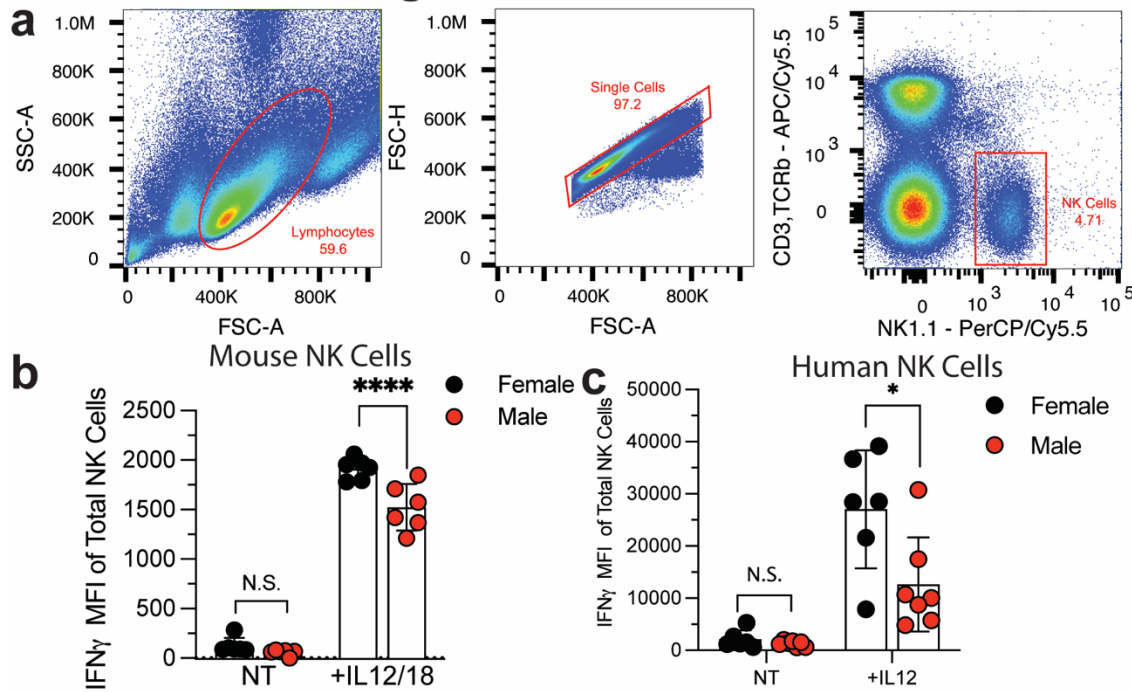

499

500 **Extended Data Figure 1: Male NK cells from mice and humans produce less IFN- $\gamma$  than**  
501 **females in response to proinflammatory cytokines. a)** Gating strategy for identification of NK  
502 cells (CD3 $^{-}$ , TCR- $\beta^{-}$  NK1.1 $^{+}$ ) in spleen of C57BL/6 mice. MFI of IFN- $\gamma$  of NK cells from **b)** mouse  
503 stimulated with no treatment (NT) or IL-12 (20 ng/ml) and IL-18 (10 ng/ml) and **c)** human NK  
504 cells stimulated with no treatment (NT) IL-12 (10ng/ml). Samples were compared using paired  
505 two-tailed Student's t test and data points are presented as individual samples with the mean  $\pm$   
506 SEM (N.S., Not Significant; \*, p<0.05; \*\*\*\*, p<0.0001).

507

508

## Extended Data Figure 2

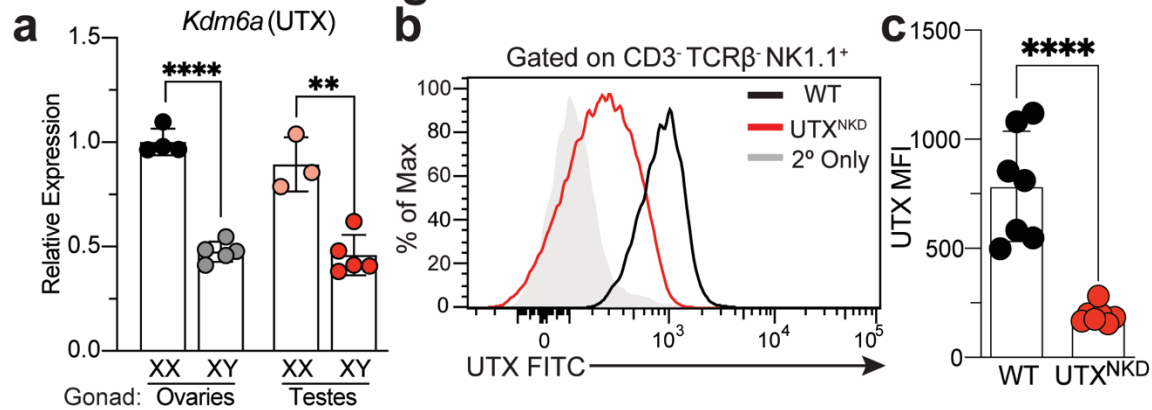

509

510 **Extended Data Figure 2: UTX expression in FCG and UTX<sup>NKD</sup> mice. a)** Relative expression

511 of *Kdm6a* (UTX) by RT-qPCR from NK cell isolated from spleens of Four Core Genotype (FCG)

512 mice (gonadal female XX n = 5, gonadal female XY n = 5, gonadal male XX n = 3, and gonadal

513 male XY n = 5). **b)** Representative histogram plot and **c)** MFI of UTX protein expression in

514 splenic NK cells (CD3<sup>-</sup> TCRβ<sup>-</sup> NK1.1<sup>+</sup>) in WT (*Kdm6a*<sup>fl/fl</sup> x *Ncr1*<sup>cre-</sup>) and UTX<sup>NKD</sup> (*Kdm6a*<sup>fl/fl</sup> x

515 *Ncr1*<sup>cre+</sup>) mice at steady state (n = 7). Samples were compared using paired two-tailed

516 Student's t test and data points are presented as individual mice with the mean ± SEM

517 (\*\*, p<0.01; \*\*\*\*, p<0.0001).

518

519

### Extended Data Figure 3

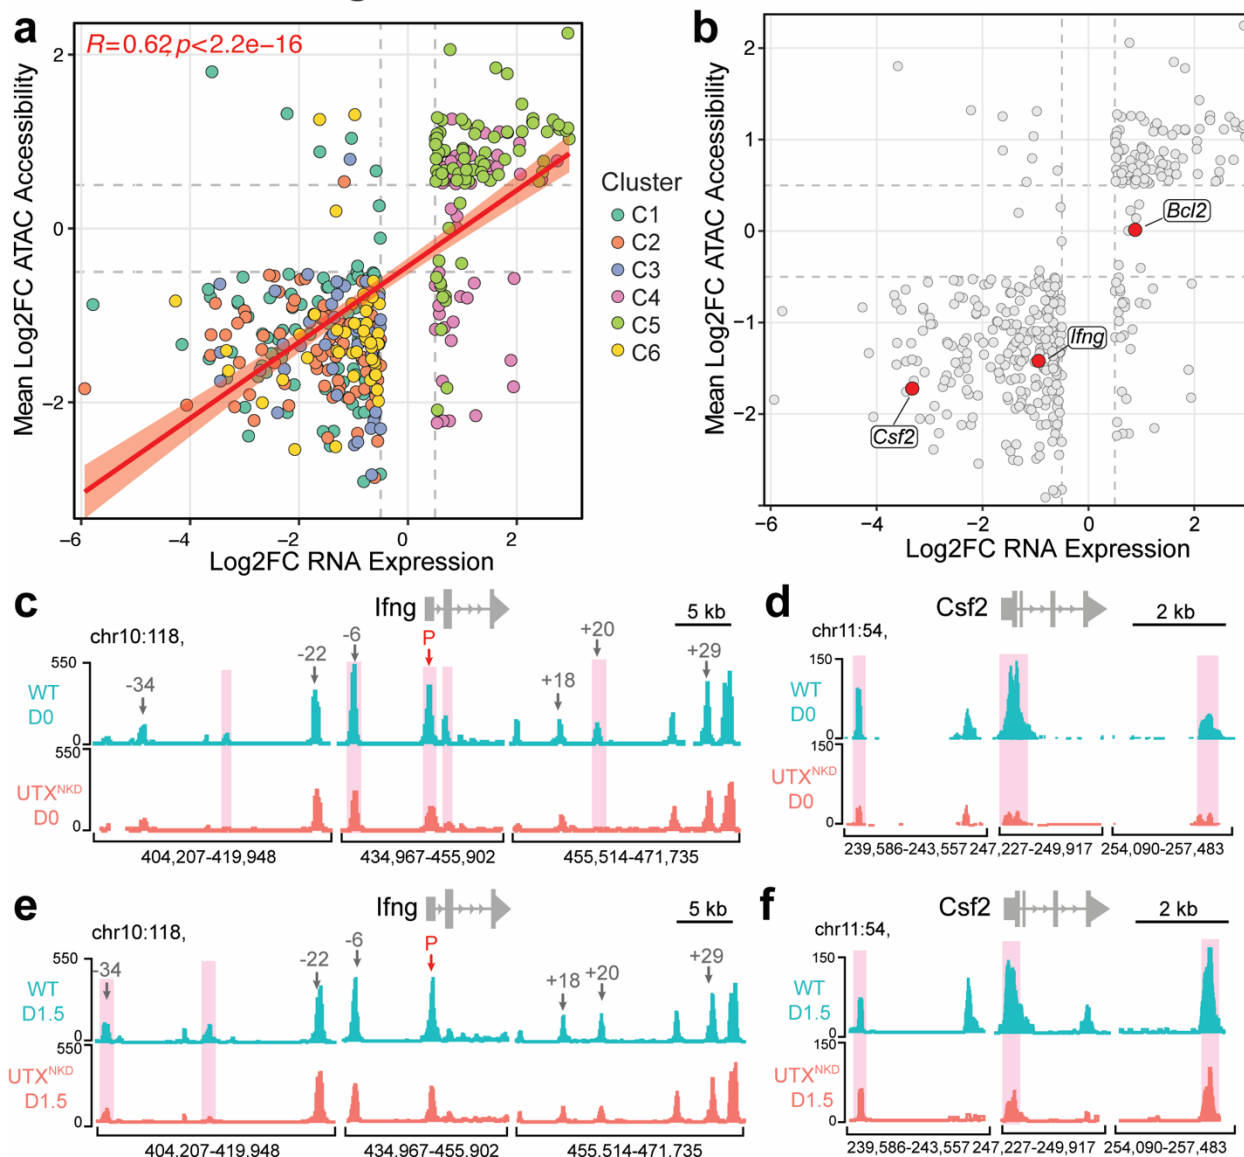

520

521 **Extended Data Figure 3: Integrative ATAC and RNA seq analysis reveal concomitant**  
 522 **changes in chromatin accessibility and transcription mediated by UTX. a)** Scatter plot  
 523 highlighting genes that were differentially accessible and expressed (FDR and adjusted p-value  
 524  $< 0.05$ ) colored by fuzzy c-means cluster (see **Figure 4**). Y-axis depicts mean log<sub>2</sub> fold change  
 525 of ATAC accessibility peaks and x-axis depicts log<sub>2</sub> fold change of RNA-seq transcript levels.  
 526 Best fit regression line (red) with standard error (light red ribbon). Positive correlation calculated  
 527 by Spearman correlation of dataset ( $R=0.62, p<2.2\times 10^{-16}$ ). **b)** Specific genes of interest

528 highlighted in red (*Ifng*, *Csf2*, *Casp3*, *Bcl2*) with known roles in NK cell gene programs. **c-f**)  
529 Representative tracks of ATAC-seq signal of genes involved in NK effector function **c)** *Ifng* and  
530 **d)** *Csf2* in NK cells isolated at rest (D0) and **e)** *Ifng* and **f)** *Csf2* 1.5 days post MCMV infection  
531 from WT:UTX<sup>NKD</sup> mBMCs. Red highlighted areas represent significant differentially accessible  
532 regions (FDR and p-value < 0.05).  
533

## Extended Data Figure 4

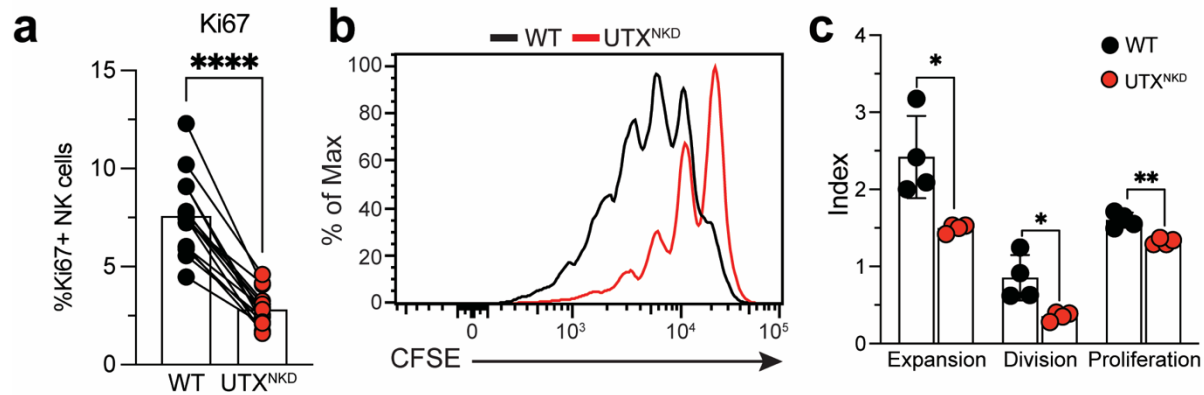

534

535 **Extended Data Figure 4: UTX deficient NK cells are less proliferative than WT. a)**

536 Percentage of Ki67<sup>+</sup> total NK cells in blood of WT:UTX<sup>NKD</sup> mBMCs (n=28). **b)** Representative

537 flow cytometry plot and **c)** quantification of CFSE expansion, division and proliferation indexes

538 of CFSE-labeled splenic NK cells from WT:UTX<sup>NKD</sup> mBMCs stimulated *ex vivo* with IL-15 (50

539 ng/mL) for 4 days. Data represent 2-3 independent experiments. **a)** Samples were compared

540 using paired and **b-c)** unpaired two-tailed Student's t test and data points are presented as

541 individual mice with the mean ± SEM (\*, p <0.05; \*\*, p <0.01).

542

## Extended Data Figure 5

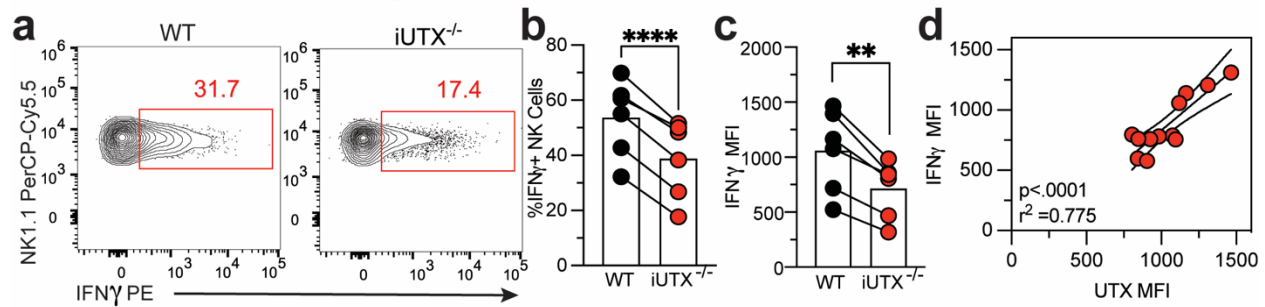

543

544 **Extended Data Figure 5: UTX regulates IFN- $\gamma$  production in a dose-dependent manner.**

545 WT:UTX<sup>-/-</sup> mBMCs were produced from WT (CD45.1<sup>+</sup>) and iUTX<sup>-/-</sup> (CD45.2<sup>+</sup>) and treated with  
546 tamoxifen for 3 days (1mg/day) prior to MCMV infection. **g**) Representative flow cytometry plot  
547 and **h**) %IFN- $\gamma$ <sup>+</sup> and **i**) IFN- $\gamma$  MFI of splenic NK cells at D1.5 post-MCMV infection of WT:iUTX<sup>-/-</sup>  
548 mBMCs (n = 6). **j**) Correlation of IFN- $\gamma$  vs. UTX MFI of total splenic NK cells (n = 12). Two-tailed  
549 correlation of XY data performed. Pearson's r<sup>2</sup> = 0.775, and p < 0.0001. Data are representative  
550 of 2-3 independent experiments. Samples were compared using paired two-tailed Student's t  
551 test and data points are presented as individual mice with the mean  $\pm$  SEM (\*\*, p < 0.01; \*\*\*\*,  
552 p < 0.0001).

## Extended Data Figure 6

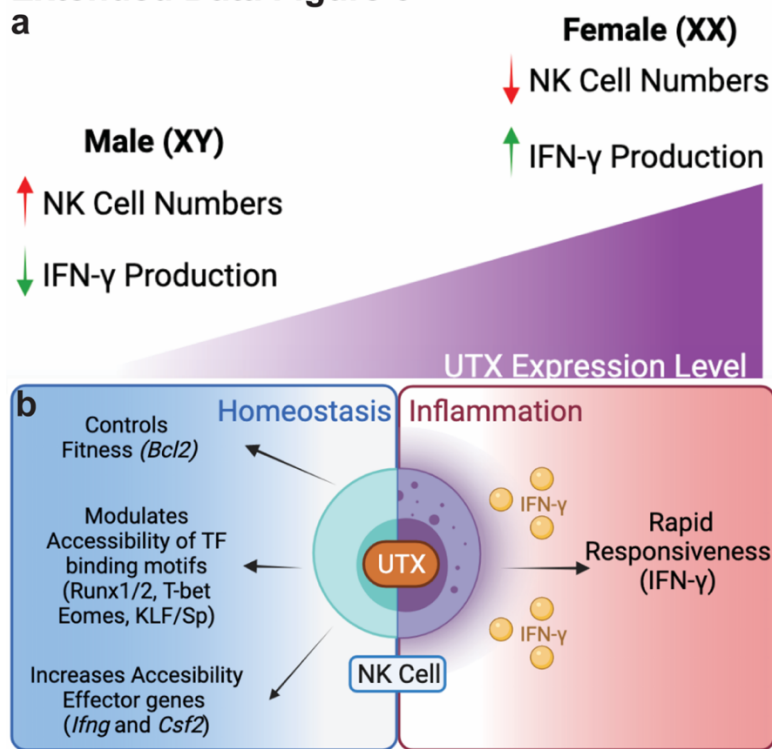

553

554 **Extended Data Figure 6: Schematic of UTX-mediated sex differences in regulation of NK**

555 **cell homeostasis and effector function. a)** Schematic of how differential UTX expression

556 levels may underlie sexual dimorphism in NK cell composition and function. In male mice, lower

557 UTX levels is associated with expansion of NK cell numbers and decreased NK cell IFN-γ

558 production. **b)** Model in which UTX plays a role to control NK cell fitness and effector function.

559 UTX controls 1) NK cell fitness through restricting *Bcl-2* expression, 2) accessibility of TF

560 binding motifs (Runx1/2, T-bet, Eomes, KLF/Sp), and 3) direct changes in chromatin

561 accessibility of effector loci (*Ifng*, *Csf2*). Ultimately, UTX poises NK cells in an optimal epigenetic

562 state to rapidly respond to viral infection by robust effector molecule production (IFN-γ) resulting

563 in protection against viral infection.

564

565

566

## 567 **Contact for Reagent and Resource Sharing**

568 Further information and requests for resources and reagents should be directed and will be  
569 fulfilled by the Corresponding Authors, Timothy O'Sullivan ([tosullivan@mednet.ucla.edu](mailto:tosullivan@mednet.ucla.edu)) and  
570 Maureen Su ([masu@mednet.ucla.edu](mailto:masu@mednet.ucla.edu))

571

## 572 **Method Details**

### 573 **Mice**

574 Mice were bred at UCLA in accordance with the guidelines of the institutional Animal Care and  
575 Use Committee (IACUC). The following mouse strains were used in this study: C57BL/6  
576 (CD45.2) (Jackson Labs, #000664), B6.SJL (CD45.1) (Jackson Labs, #002114), *Rosa26*<sup>ERT2Cre</sup>,  
577 *Ncr1*<sup>Cre</sup>, *Kdm6a*<sup>fl/fl</sup> and FCG mice. For experiments with gonadectomy, procedure was performed  
578 by Jackson Laboratories Surgical Services. For experiments in UTX<sup>NKD</sup> mice, only female mice  
579 were used to control for Y chromosome and sex hormone independent effects. Thus,  
580 experiments were conducted using 6-8 week old age-matched females in accordance with  
581 approved institutional protocols. For comparisons between male and female WT, we used 6-8  
582 weeks age-matched littermates. Mixed bone marrow chimeras (mBMCs) were generated by  
583 depleting host CD45.1 x CD45.2 mice by intraperitoneal (i.p.) injection of busulfan (1mg/mL) at  
584 20mg/kg for 3 consecutive days, which were then reconstituted 24 hours later with various  
585 mixtures of bone marrow cells from WT (CD45.1) and knockout (CD45.2) donor mice in the  
586 presence of an anti-NK1.1 antibody (at 1 mg/ml; clone: PK136) to deplete any remaining mature  
587 NK cells.

588

### 589 *MCMV infection*

590 MCMV (Smith) was serially passaged through BALB/c hosts three times, and then salivary  
591 gland viral stocks were prepared with a dounce homogenizer for dissociating the salivary glands  
592 of infected mice 3 weeks after infection. Experimental mice in studies were infected with MCMV



593 by i.p. injection of  $7.5 \times 10^3$  plaque-forming units (PFU) in 0.5 mL of PBS. Mice were monitored  
594 and weighed daily and sacrificed when body weight dropped over 20% from initial weight.

595

#### 596 *Isolation and enrichment of mouse NK cells*

597 Mouse spleens, livers, lungs, and blood were harvested and prepared into single cell  
598 suspensions as described previously<sup>57</sup>. Splenic single cell suspensions were lysed in red blood  
599 cell lysis buffer and resuspended in EasySep™ buffer (Stemcell). To avoid depleting Ly6C<sup>+</sup> NK  
600 cells we developed a custom antibody cocktail as follows: splenocytes were labeled with 10 µg  
601 per spleen of biotin conjugated antibodies against CD3 (17A2), CD19 (6D5), CD8 (53-6.7),  
602 CD88 (20/70), Ly6G (1A8), SiglecF (S17007L), TCRβ (H57-597), CD20 (SA275A11), CD172a  
603 (P84) and magnetically depleted from total splenocyte suspensions with the use of anti-biotin  
604 coupled magnetic beads (Biolegend)<sup>58</sup>.

605

#### 606 *Ex vivo stimulation of lymphocytes*

607  $\sim 5 \times 10^5$  NK cells were stimulated for 5 hours in complete RPMI media (RPMI 1640 + 25 mM  
608 HEPES + 10% FBS, 1% L-glutamine, 1% 200 mM sodium pyruvate, 1% MEM-NEAA, 1%  
609 penicillin-streptomycin, 0.5% sodium bicarbonate, 0.01% 55 mM 2-mercaptoethanol), Brefeldin  
610 A (1:1000; BioLegend) and Monensin (2µM; BioLegend) with or without recombinant mouse IL-  
611 12 (20 ng/ml; Peprotech) and recombinant mouse IL-18 (10ng/ml; Peprotech). Cells were  
612 cultured in complete RPMI media alone as a negative control (No Treatment or NT).

613

#### 614 *Human NK cell culture and Stimulation*

615 Human peripheral blood mononuclear cells (PBMCs) from anonymous healthy donors were  
616 obtained from leukoreduction filters after platelet apheresis from the UCLA Virology Core. NK  
617 cells were isolated using the EasySep Human NK Cell Isolation Kit (Stem Cell Technologies)  
618 following manufacturer instructions. Following isolation, cells were maintained in 24-well G-Rex

619 plates (Wilson Wolf) in NK MACS media (Miltenyi Biotech) supplemented with human IL-2 (100  
620 IU/mL, Peprotech) and human IL-15 (20 ng/mL, Peprotech) at a plating density of  $5 \times 10^6$  cells  
621 per well. For cytokine stimulation, 14 d IL-2/IL-15 activated human NK cells were plated with  
622 K562 leukemia cells at an effector:target (E:T) ratio of 2.5:1 in addition to human IL-2 (100  
623 IU/mL, Peprotech), human IL-15 (20 ng/mL, Peprotech), human IL-12 (10 ng/mL, Peprotech),  
624 and/or human IL-18 (100 ng/mL, Peprotech) in complete RPMI media (Thermo Fisher). NK cells  
625 were stimulated with cytokines for 16 h before analysis by flow cytometry.

626

#### 627 *Proliferation assays*

628 CellTrace™ CFSE (Thermo) stock solution was prepared per the manufacturers' instructions  
629 and diluted at 1:10,000 in 37C PBS. Isolated NK cells were incubated in 0.5mL of diluted CFSE  
630 solution for 5 minutes at 37C. The solution was quenched with 10X the volume of complete  
631 RPMI media. Cells were then washed and plated with 50 ng/ml of recombinant mouse IL-15  
632 (Peprotech) and cultured for 4 days to assess proliferation. Flow cytometry was used to quantify  
633 CFSE dilution 4 days post-stimulation. Samples were compared to levels of CFSE labeled on  
634 Day 0. FlowJo's proliferation tool was used to model and measure number of divisions in  
635 addition to expansion, division, and proliferation indices.

636

#### 637 *Flow Cytometry and Cell Sorting*

638 Cells were analyzed for cell-surface markers using fluorophore-conjugated antibodies  
639 (BioLegend, eBioscience). Cell surface staining was performed in FACS Buffer (2% FBS and 2  
640 mM EDTA in PBS) and intracellular staining was performed by fixing and permeabilizing using  
641 the eBioscience Foxp3/Transcription Factor kit for intranuclear proteins or BD Cytofix/Cytoperm  
642 kits for cytokines. Flow cytometry was performed using the Attune NxT Acoustic Focusing  
643 cytometer and data were analyzed with FlowJo software (TreeStar). NK cells were identified as  
644 CD3<sup>-</sup> TCRβ<sup>-</sup> NK1.1<sup>+</sup> cells: see gating strategy in Extended Data Fig. 1. Cell surface and

645 intracellular staining was performed using the following fluorophore-conjugated antibodies:  
646 CD45.1 (A20), CD45.2 (104), NK1.1 (PK136), TCR $\beta$  (H57-597), CD3 (17A2), IFN- $\gamma$  (XMG1.2),  
647 Ly6C (HK1.4), BCL2 (BCL/10C4), UTX (N2C1 - GeneTex), Goat anti-rabbit H&L (Abcam -  
648 ab6717), BIM (c34c5), CD90 (30-H12), Ki-67 (16A8). Isolated splenic NK cells were sorted  
649 using Aria-H Cytometer to > 95% purity.

650

#### 651 *RNA-seq and ATAC-seq library construction and analysis*

652 RNA was isolated from the cells using RNeasy Mini kit (Qiagen) and used to generate RNA-seq  
653 libraries followed by sequencing using Illumina HighSeq 4000 platform (single end, 50bp). The  
654 reads were mapped with HISAT2 (version 2.2.1) to the mouse genome (mm10). The counts for  
655 each gene were obtained by HtSeq<sup>59</sup>, in print, online at doi:10.1093/bioinformatics/btu638).  
656 Differential expression analyses were carried out using DESeq2<sup>60</sup> (version 1.24.0) with default  
657 parameters. Genes with adjusted p value <0.05 were considered significantly differentially  
658 expressed. Sequencing depth normalized counts were used to plot the expression values for  
659 individual genes.

660 ATAC-seq libraries were produced by the Applied Genomics, Computation, and  
661 Translational Core Facility at Cedars Sinai in the following manner: 50,000 cells per sample  
662 were lysed to collect nuclei and treated with Tn5 transposase (Illumina) for 30 minutes at 37°C  
663 with gentle agitation. The DNA was isolated with DNA Clean & Concentrator Kit (Zymo) and  
664 PCR amplified and barcoded with NEBNext High-Fidelity PCR Mix (New England Biolabs) and  
665 unique dual indexes (Illumina). The ATAC-Seq library amplification was confirmed by real-time  
666 PCR, and additional barcoding PCR cycles were added as necessary while avoiding  
667 overamplification. Amplified ATAC-Seq libraries were purified with DNA Clean & Concentrator  
668 Kit (Zymo). The purified libraries were quantified with Kapa Library Quant Kit (KAPA  
669 Biosystems) and quality assessed on 4200 TapeStation System (Agilent). The libraries were

670 pooled based on molar concentrations and sequenced on an Illumina HighSeq 4000 platform  
671 (paired end, 100bp).

672 ATAC-seq fastq files were trimmed to remove low-quality reads and adapters using  
673 Cutadapt<sup>61</sup> (version 2.3). The reads were aligned to the reference mouse genome (mm10) with  
674 bowtie2<sup>62</sup> (version 2.2.9). Peak calling was performed with MACS2<sup>63</sup> (version 2.1.1). The peaks  
675 from all samples were merged into a single bed file, peaks from different samples that were  
676 closer than 10bp were merged into a single peak. HTseq<sup>59</sup> (version 0.9.1) was used to count the  
677 number of reads that overlap each peak per sample. The peak counts were analyzed with  
678 DESeq2<sup>60</sup> (version 1.24.0) to identify differentially accessible genomic regions. Peaks with  
679 adjusted p-value < 0.05 were considered significantly differentially accessible. The peak counts  
680 were visualized with Integrated Genome Browser, (version 9.1.8).

681 Fuzzy c-means clustering was used for both ATAC-seq and RNA-seq using significant  
682 (p-value and FDR <0.05, Log<sub>2</sub>FC +/- 0.5) normalized counts generated from DESeq2. MFuzz  
683 package (version 3.14) within R was used to perform this analysis into 6 clusters with a  
684 membership score of >0.5. The differentially accessible ATAC peaks were analyzed using the  
685 findMotifsGenome.pl function from HOMER<sup>37</sup> (version 4.9.1) of each cluster to identify enriched  
686 cis-regulatory motifs of transcription factors. Pathway analysis of clustered RNA-seq data was  
687 performed using g:Profiler using the g:GOST function. Top relevant pathways were selected  
688 from KEGG Biological Pathways and Gene Ontology Pathways (Biological Processes and  
689 Molecular Function).

690

### 691 *Statistical Analyses*

692 For graphs, data are shown as mean ± SEM, and unless otherwise indicated, statistical  
693 differences were evaluated using a Student's t-test. For Kaplan-Meier survival curve, samples  
694 were compared using the Log-rank (Mantel-Cox) test with correction for testing multiple  
695 hypotheses. A p-value < 0.05 was considered significant. Graphs were produced and statistical

696 analyses were performed using GraphPad Prism and ggplot2 library in R. Spearman Correlation  
697 on best fit regression line was performed using ggpubr library in R.

698

699 *Data Availability*

700 Sequencing datasets are accessible from GEO with accession number GSE185065. Data can  
701 be accessed by reviewers using the access token ilqlqswavvqhtir.

702

## 703 References

- 704 1 Wilkinson, N. M., Chen, H. C., Lechner, M. G. & Su, M. A. Sex Differences in Immunity.  
705 *Annu Rev Immunol*, doi:10.1146/annurev-immunol-101320-125133 (2022).
- 706 2 Klein, S. L. & Flanagan, K. L. Sex differences in immune responses. *Nat Rev Immunol*  
707 **16**, 626-638, doi:10.1038/nri.2016.90 (2016).
- 708 3 Pardue, M.-L. & Witzemann, T. M. Exploring the biological contributions to human health:  
709 does sex matter? (2001).
- 710 4 Gianella, S., Tran, S. M., Morris, S., Vargas, M., Porrachia, M., Oliveira, M. F., Lada, S.,  
711 Zhao, M., Ellsworth, G. B., Mathad, J. S. & Wilkin, T. Sex Differences in CMV  
712 Replication and HIV Persistence During Suppressive ART. *Open Forum Infect Dis* **7**,  
713 ofaa289, doi:10.1093/ofid/ofaa289 (2020).
- 714 5 Takahashi, T. & Iwasaki, A. Sex differences in immune responses. *Science* **371**, 347-  
715 348, doi:10.1126/science.abe7199 (2021).
- 716 6 Abdullah, M., Chai, P. S., Chong, M. Y., Tohit, E. R., Ramasamy, R., Pei, C. P. &  
717 Vidyadaran, S. Gender effect on in vitro lymphocyte subset levels of healthy individuals.  
718 *Cell Immunol* **272**, 214-219, doi:10.1016/j.cellimm.2011.10.009 (2012).
- 719 7 Lee, B. W., Yap, H. K., Chew, F. T., Quah, T. C., Prabhakaran, K., Chan, G. S., Wong,  
720 S. C. & Seah, C. C. Age- and sex-related changes in lymphocyte subpopulations of  
721 healthy Asian subjects: from birth to adulthood. *Cytometry* **26**, 8-15,  
722 doi:10.1002/(sici)1097-0320(19960315)26:1<8::aid-cyto2>3.0.co;2-e (1996).
- 723 8 Melzer, S., Zachariae, S., Bocsi, J., Engel, C., Loffler, M. & Tarnok, A. Reference  
724 intervals for leukocyte subsets in adults: Results from a population-based study using  
725 10-color flow cytometry. *Cytometry B Clin Cytom* **88**, 270-281, doi:10.1002/cyto.b.21234  
726 (2015).
- 727 9 Patin, E., Hasan, M., Bergstedt, J., Rouilly, V., Libri, V., Urrutia, A., Alanio, C.,  
728 Scepanovic, P., Hammer, C., Jonsson, F., Beitz, B., Quach, H., Lim, Y. W., Hunkapiller,  
729 J., Zepeda, M., Green, C., Piasecka, B., Leloup, C., Rogge, L., Huetz, F., Peguillet, I.,  
730 Lantz, O., Fontes, M., Di Santo, J. P., Thomas, S., Fellay, J., Duffy, D., Quintana-Murci,  
731 L., Albert, M. L. & Milieu Interieur, C. Natural variation in the parameters of innate  
732 immune cells is preferentially driven by genetic factors. *Nat Immunol* **19**, 302-314,  
733 doi:10.1038/s41590-018-0049-7 (2018).
- 734 10 Huang, Z., Chen, B., Liu, X., Li, H., Xie, L., Gao, Y., Duan, R., Li, Z., Zhang, J., Zheng,  
735 Y. & Su, W. Effects of sex and aging on the immune cell landscape as assessed by  
736 single-cell transcriptomic analysis. *Proc Natl Acad Sci U S A* **118**,  
737 doi:10.1073/pnas.2023216118 (2021).
- 738 11 Fang, H., Disteché, C. M. & Berletch, J. B. X Inactivation and Escape: Epigenetic and  
739 Structural Features. *Front Cell Dev Biol* **7**, 219, doi:10.3389/fcell.2019.00219 (2019).
- 740 12 Chen, X., Watkins, R., Delot, E., Reliene, R., Schiestl, R. H., Burgoyne, P. S. & Arnold,  
741 A. P. Sex difference in neural tube defects in p53-null mice is caused by differences in  
742 the complement of X not Y genes. *Dev Neurobiol* **68**, 265-273, doi:10.1002/dneu.20581  
743 (2008).
- 744 13 Smith-Bouvier, D. L., Divekar, A. A., Sasidhar, M., Du, S., Tiwari-Woodruff, S. K., King,  
745 J. K., Arnold, A. P., Singh, R. R. & Voskuhl, R. R. A role for sex chromosome  
746 complement in the female bias in autoimmune disease. *J Exp Med* **205**, 1099-1108,  
747 doi:10.1084/jem.20070850 (2008).
- 748 14 Hammer, Q., Ruckert, T. & Romagnani, C. Natural killer cell specificity for viral  
749 infections. *Nat Immunol* **19**, 800-808, doi:10.1038/s41590-018-0163-6 (2018).
- 750 15 Orange, J. S. Natural killer cell deficiency. *J Allergy Clin Immunol* **132**, 515-525,  
751 doi:10.1016/j.jaci.2013.07.020 (2013).

- 752 16 Biron, C. A., Byron, K. S. & Sullivan, J. L. Severe herpesvirus infections in an adolescent  
753 without natural killer cells. *N Engl J Med* **320**, 1731-1735,  
754 doi:10.1056/NEJM198906293202605 (1989).
- 755 17 Scalzo, A. A., Fitzgerald, N. A., Simmons, A., La Vista, A. B. & Shellam, G. R. Cmv-1, a  
756 genetic locus that controls murine cytomegalovirus replication in the spleen. *J Exp Med*  
757 **171**, 1469-1483 (1990).
- 758 18 Bukowski, J. F., Warner, J. F., Dennert, G. & Welsh, R. M. Adoptive transfer studies  
759 demonstrating the antiviral effect of natural killer cells in vivo. *J Exp Med* **161**, 40-52  
760 (1985).
- 761 19 Welsh, R. M., Brubaker, J. O., Vargas-Cortes, M. & O'Donnell, C. L. Natural killer (NK)  
762 cell response to virus infections in mice with severe combined immunodeficiency. The  
763 stimulation of NK cells and the NK cell-dependent control of virus infections occur  
764 independently of T and B cell function. *J Exp Med* **173**, 1053-1063 (1991).
- 765 20 Brown, M. G., Dokun, A. O., Heusel, J. W., Smith, H. R., Beckman, D. L., Blattenberger,  
766 E. A., Dubbelde, C. E., Stone, L. R., Scalzo, A. A. & Yokoyama, W. M. Vital involvement  
767 of a natural killer cell activation receptor in resistance to viral infection. *Science* **292**,  
768 934-937, doi:10.1126/science.1060042 (2001).
- 769 21 Daniels, K. A., Devora, G., Lai, W. C., O'Donnell, C. L., Bennett, M. & Welsh, R. M.  
770 Murine cytomegalovirus is regulated by a discrete subset of natural killer cells reactive  
771 with monoclonal antibody to Ly49H. *J Exp Med* **194**, 29-44 (2001).
- 772 22 Bukowski, J. F., Woda, B. A., Habu, S., Okumura, K. & Welsh, R. M. Natural killer cell  
773 depletion enhances virus synthesis and virus-induced hepatitis in vivo. *J Immunol* **131**,  
774 1531-1538 (1983).
- 775 23 Bancroft, G. J., Shellam, G. R. & Chalmer, J. E. Genetic influences on the augmentation  
776 of natural killer (NK) cells during murine cytomegalovirus infection: correlation with  
777 patterns of resistance. *J Immunol* **126**, 988-994 (1981).
- 778 24 Welsh, R. M., Dundon, P. L., Eynon, E. E., Brubaker, J. O., Koo, G. C. & O'Donnell, C. L.  
779 Demonstration of the antiviral role of natural killer cells in vivo with a natural killer cell-  
780 specific monoclonal antibody (NK 1.1). *Nat Immun Cell Growth Regul* **9**, 112-120 (1990).
- 781 25 Shellam, G. R., Allan, J. E., Papadimitriou, J. M. & Bancroft, G. J. Increased  
782 susceptibility to cytomegalovirus infection in beige mutant mice. *Proc Natl Acad Sci U S*  
783 *A* **78**, 5104-5108 (1981).
- 784 26 Menees, K. B., Earls, R. H., Chung, J., Jernigan, J., Filipov, N. M., Carpenter, J. M. &  
785 Lee, J. K. Sex- and age-dependent alterations of splenic immune cell profile and NK cell  
786 phenotypes and function in C57BL/6J mice. *Immun Ageing* **18**, 3, doi:10.1186/s12979-  
787 021-00214-3 (2021).
- 788 27 Mujal, A. M., Delconte, R. B. & Sun, J. C. Natural Killer Cells: From Innate to Adaptive  
789 Features. *Annu Rev Immunol* **39**, 417-447, doi:10.1146/annurev-immunol-101819-  
790 074948 (2021).
- 791 28 Lauwerys, B. R., Renaud, J. C. & Houssiau, F. A. Synergistic proliferation and activation  
792 of natural killer cells by interleukin 12 and interleukin 18. *Cytokine* **11**, 822-830,  
793 doi:10.1006/cyto.1999.0501 (1999).
- 794 29 Nakaya, M., Tachibana, H. & Yamada, K. Effect of estrogens on the interferon-gamma  
795 producing cell population of mouse splenocytes. *Biosci Biotechnol Biochem* **70**, 47-53,  
796 doi:10.1271/bbb.70.47 (2006).
- 797 30 Berletch, J. B., Ma, W., Yang, F., Shendure, J., Noble, W. S., Distche, C. M. & Deng, X.  
798 Escape from X inactivation varies in mouse tissues. *PLoS Genet* **11**, e1005079,  
799 doi:10.1371/journal.pgen.1005079 (2015).
- 800 31 Arnold, A. P. Four Core Genotypes and XY\* mouse models: Update on impact on SABV  
801 research. *Neurosci Biobehav Rev* **119**, 1-8, doi:10.1016/j.neubiorev.2020.09.021 (2020).

- 802 32 Sciume, G., Mikami, Y., Jankovic, D., Nagashima, H., Villarino, A. V., Morrison, T., Yao,  
803 C., Signorella, S., Sun, H. W., Brooks, S. R., Fang, D., Sartorelli, V., Nakayamada, S.,  
804 Hirahara, K., Zitti, B., Davis, F. P., Kanno, Y., O'Shea, J. J. & Shih, H. Y. Rapid  
805 Enhancer Remodeling and Transcription Factor Repurposing Enable High Magnitude  
806 Gene Induction upon Acute Activation of NK Cells. *Immunity* **53**, 745-758 e744,  
807 doi:10.1016/j.immuni.2020.09.008 (2020).
- 808 33 Shih, H. Y., Sciume, G., Mikami, Y., Guo, L., Sun, H. W., Brooks, S. R., Urban, J. F., Jr.,  
809 Davis, F. P., Kanno, Y. & O'Shea, J. J. Developmental Acquisition of Regulomes  
810 Underlies Innate Lymphoid Cell Functionality. *Cell* **165**, 1120-1133,  
811 doi:10.1016/j.cell.2016.04.029 (2016).
- 812 34 Miller, S. A., Mohn, S. E. & Weinmann, A. S. Jmjd3 and UTX play a demethylase-  
813 independent role in chromatin remodeling to regulate T-box family member-dependent  
814 gene expression. *Mol Cell* **40**, 594-605, doi:10.1016/j.molcel.2010.10.028 (2010).
- 815 35 Dembele, D. & Kastner, P. Fuzzy C-means method for clustering microarray data.  
816 *Bioinformatics* **19**, 973-980, doi:10.1093/bioinformatics/btg119 (2003).
- 817 36 Raudvere, U., Kolberg, L., Kuzmin, I., Arak, T., Adler, P., Peterson, H. & Vilo, J.  
818 g:Profiler: a web server for functional enrichment analysis and conversions of gene lists  
819 (2019 update). *Nucleic Acids Res* **47**, W191-W198, doi:10.1093/nar/gkz369 (2019).
- 820 37 Heinz, S., Benner, C., Spann, N., Bertolino, E., Lin, Y. C., Laslo, P., Cheng, J. X., Murre,  
821 C., Singh, H. & Glass, C. K. Simple combinations of lineage-determining transcription  
822 factors prime cis-regulatory elements required for macrophage and B cell identities. *Mol*  
823 *Cell* **38**, 576-589, doi:10.1016/j.molcel.2010.05.004 (2010).
- 824 38 Rapp, M., Lau, C. M., Adams, N. M., Weizman, O. E., O'Sullivan, T. E., Geary, C. D. &  
825 Sun, J. C. Core-binding factor beta and Runx transcription factors promote adaptive  
826 natural killer cell responses. *Sci Immunol* **2**, doi:10.1126/sciimmunol.aan3796 (2017).
- 827 39 Simonetta, F., Pradier, A. & Roosnek, E. T-bet and Eomesodermin in NK Cell  
828 Development, Maturation, and Function. *Front Immunol* **7**, 241,  
829 doi:10.3389/fimmu.2016.00241 (2016).
- 830 40 Presnell, J. S., Schnitzler, C. E. & Browne, W. E. KLF/SP Transcription Factor Family  
831 Evolution: Expansion, Diversification, and Innovation in Eukaryotes. *Genome Biol Evol* **7**,  
832 2289-2309, doi:10.1093/gbe/evv141 (2015).
- 833 41 Viant, C., Guia, S., Hennessy, R. J., Rautela, J., Pham, K., Bernat, C., Goh, W., Jiao, Y.,  
834 Delconte, R., Roger, M., Simon, V., Souza-Fonseca-Guimaraes, F., Grabow, S., Belz, G.  
835 T., Kile, B. T., Strasser, A., Gray, D., Hodgkin, P. D., Beutler, B., Vivier, E., Ugolini, S. &  
836 Huntington, N. D. Cell cycle progression dictates the requirement for BCL2 in natural  
837 killer cell survival. *J Exp Med* **214**, 491-510, doi:10.1084/jem.20160869 (2017).
- 838 42 Louis, C., Souza-Fonseca-Guimaraes, F., Yang, Y., D'Silva, D., Kratina, T., Dagley, L.,  
839 Hedyeh-Zadeh, S., Rautela, J., Masters, S. L., Davis, M. J., Babon, J. J., Ciric, B.,  
840 Vivier, E., Alexander, W. S., Huntington, N. D. & Wicks, I. P. NK cell-derived GM-CSF  
841 potentiates inflammatory arthritis and is negatively regulated by CIS. *J Exp Med* **217**,  
842 doi:10.1084/jem.20191421 (2020).
- 843 43 Kramer, B., Knoll, R., Bonaguro, L., ToVinh, M., Raabe, J., Astaburuaga-Garcia, R.,  
844 Schulte-Schrepping, J., Kaiser, K. M., Rieke, G. J., Bischoff, J., Monin, M. B.,  
845 Hoffmeister, C., Schlabe, S., De Domenico, E., Reusch, N., Handler, K., Reynolds, G.,  
846 Bluthgen, N., Hack, G., Finnemann, C., Nischalke, H. D., Strassburg, C. P., Stephenson,  
847 E., Su, Y., Gardner, L., Yuan, D., Chen, D., Goldman, J., Rosenstiel, P., Schmidt, S. V.,  
848 Latz, E., Hrusovsky, K., Ball, A. J., Johnson, J. M., Koenig, P. A., Schmidt, F. I., Haniffa,  
849 M., Heath, J. R., Kummerer, B. M., Keitel, V., Jensen, B., Stubbemann, P., Kurth, F.,  
850 Sander, L. E., Sawitzki, B., Deutsche, C.-O. I., Aschenbrenner, A. C., Schultze, J. L. &  
851 Nattermann, J. Early IFN-alpha signatures and persistent dysfunction are distinguishing



- 852 features of NK cells in severe COVID-19. *Immunity* **54**, 2650-2669 e2614,  
853 doi:10.1016/j.immuni.2021.09.002 (2021).
- 854 44 Cook, K. D., Shpargel, K. B., Starmer, J., Whitfield-Larry, F., Conley, B., Allard, D. E.,  
855 Rager, J. E., Fry, R. C., Davenport, M. L., Magnuson, T., Whitmire, J. K. & Su, M. A. T  
856 Follicular Helper Cell-Dependent Clearance of a Persistent Virus Infection Requires T  
857 Cell Expression of the Histone Demethylase UTX. *Immunity* **43**, 703-714,  
858 doi:10.1016/j.immuni.2015.09.002 (2015).
- 859 45 Beyaz, S., Kim, J. H., Pinello, L., Xifaras, M. E., Hu, Y., Huang, J., Kerenyi, M. A., Das,  
860 P. P., Barnitz, R. A., Heralut, A., Dogum, R., Haining, W. N., Yilmaz, O. H., Passegue,  
861 E., Yuan, G. C., Orkin, S. H. & Winau, F. The histone demethylase UTX regulates the  
862 lineage-specific epigenetic program of invariant natural killer T cells. *Nat Immunol* **18**,  
863 184-195, doi:10.1038/ni.3644 (2017).
- 864 46 Mitchell, J. E., Lund, M. M., Starmer, J., Ge, K., Magnuson, T., Shpargel, K. B. &  
865 Whitmire, J. K. UTX promotes CD8(+) T cell-mediated antiviral defenses but reduces T  
866 cell durability. *Cell Rep* **35**, 108966, doi:10.1016/j.celrep.2021.108966 (2021).
- 867 47 Pomeroy, C., Delong, D., Clabots, C., Riciputi, P. & Filice, G. A. Role of interferon-  
868 gamma in murine cytomegalovirus infection. *J Lab Clin Med* **132**, 124-133,  
869 doi:10.1016/s0022-2143(98)90007-5 (1998).
- 870 48 Bosselut, R. Pleiotropic Functions of H3K27Me3 Demethylases in Immune Cell  
871 Differentiation. *Trends Immunol* **37**, 102-113, doi:10.1016/j.it.2015.12.004 (2016).
- 872 49 Wang, S. P., Tang, Z., Chen, C. W., Shimada, M., Koche, R. P., Wang, L. H., Nakadai,  
873 T., Chramiec, A., Krivtsov, A. V., Armstrong, S. A. & Roeder, R. G. A UTX-MLL4-p300  
874 Transcriptional Regulatory Network Coordinately Shapes Active Enhancer Landscapes  
875 for Eliciting Transcription. *Mol Cell* **67**, 308-321 e306, doi:10.1016/j.molcel.2017.06.028  
876 (2017).
- 877 50 Maj, T., Wang, W., Crespo, J., Zhang, H., Wang, W., Wei, S., Zhao, L., Vatan, L., Shao,  
878 I., Szeliga, W., Lyssiotis, C., Liu, J. R., Kryczek, I. & Zou, W. Oxidative stress controls  
879 regulatory T cell apoptosis and suppressor activity and PD-L1-blockade resistance in  
880 tumor. *Nat Immunol* **18**, 1332-1341, doi:10.1038/ni.3868 (2017).
- 881 51 Cribbs, A., Hookway, E. S., Wells, G., Lindow, M., Obad, S., Oerum, H., Prinjha, R. K.,  
882 Athanasou, N., Sowman, A., Philpott, M., Penn, H., Soderstrom, K., Feldmann, M. &  
883 Oppermann, U. Inhibition of histone H3K27 demethylases selectively modulates  
884 inflammatory phenotypes of natural killer cells. *J Biol Chem* **293**, 2422-2437,  
885 doi:10.1074/jbc.RA117.000698 (2018).
- 886 52 Kruidenier, L., Chung, C. W., Cheng, Z., Liddle, J., Che, K., Joberty, G., Bantscheff, M.,  
887 Bountra, C., Bridges, A., Diallo, H., Eberhard, D., Hutchinson, S., Jones, E., Katso, R.,  
888 Leveridge, M., Mander, P. K., Mosley, J., Ramirez-Molina, C., Rowland, P., Schofield, C.  
889 J., Sheppard, R. J., Smith, J. E., Swales, C., Tanner, R., Thomas, P., Tumber, A.,  
890 Drewes, G., Oppermann, U., Patel, D. J., Lee, K. & Wilson, D. M. A selective jumonji  
891 H3K27 demethylase inhibitor modulates the proinflammatory macrophage response.  
892 *Nature* **488**, 404-408, doi:10.1038/nature11262 (2012).
- 893 53 van der Heiden, M., van Zelm, M. C., Bartol, S. J. W., de Rond, L. G. H., Berbers, G. A.  
894 M., Boots, A. M. H. & Buisman, A. M. Differential effects of Cytomegalovirus carriage on  
895 the immune phenotype of middle-aged males and females. *Sci Rep* **6**, 26892,  
896 doi:10.1038/srep26892 (2016).
- 897 54 Van Laarhoven, P. M., Neitzel, L. R., Quintana, A. M., Geiger, E. A., Zackai, E. H.,  
898 Clouthier, D. E., Artinger, K. B., Ming, J. E. & Shaikh, T. H. Kabuki syndrome genes  
899 KMT2D and KDM6A: functional analyses demonstrate critical roles in craniofacial, heart  
900 and brain development. *Hum Mol Genet* **24**, 4443-4453, doi:10.1093/hmg/ddv180  
901 (2015).

- 902 55 Rezvani, K. Adoptive cell therapy using engineered natural killer cells. *Bone Marrow*  
903 *Transplant* **54**, 785-788, doi:10.1038/s41409-019-0601-6 (2019).
- 904 56 Angelo, L. S., Hogg, G. D., Abeynaïke, S., Bimler, L., Vargas-Hernandez, A. & Paust, S.  
905 Phenotypic and Functional Plasticity of CXCR6(+) Peripheral Blood NK Cells. *Front*  
906 *Immunol* **12**, 810080, doi:10.3389/fimmu.2021.810080 (2021).
- 907 57 Weizman, O. E., Adams, N. M., Schuster, I. S., Krishna, C., Pritykin, Y., Lau, C., Degli-  
908 Esposti, M. A., Leslie, C. S., Sun, J. C. & O'Sullivan, T. E. ILC1 Confer Early Host  
909 Protection at Initial Sites of Viral Infection. *Cell* **171**, 795-808 e712,  
910 doi:10.1016/j.cell.2017.09.052 (2017).
- 911 58 Riggan, L., Ma, F., Li, J. H., Fernandez, E., Nathanson, D. A., Pellegrini, M. & O'Sullivan,  
912 T. E. The transcription factor Fli1 restricts the formation of memory precursor NK cells  
913 during viral infection. *Nat Immunol*, doi:10.1038/s41590-022-01150-0 (2022).
- 914 59 Anders, S., Pyl, P. T. & Huber, W. HTSeq--a Python framework to work with high-  
915 throughput sequencing data. *Bioinformatics* **31**, 166-169,  
916 doi:10.1093/bioinformatics/btu638 (2015).
- 917 60 Love, M. I., Huber, W. & Anders, S. Moderated estimation of fold change and dispersion  
918 for RNA-seq data with DESeq2. *Genome Biol* **15**, 550, doi:10.1186/s13059-014-0550-8  
919 (2014).
- 920 61 Kechin, A., Boyarskikh, U., Kel, A. & Filipenko, M. cutPrimers: A New Tool for Accurate  
921 Cutting of Primers from Reads of Targeted Next Generation Sequencing. *J Comput Biol*  
922 **24**, 1138-1143, doi:10.1089/cmb.2017.0096 (2017).
- 923 62 Langmead, B. & Salzberg, S. L. Fast gapped-read alignment with Bowtie 2. *Nat Methods*  
924 **9**, 357-359, doi:10.1038/nmeth.1923 (2012).
- 925 63 Zhang, Y., Liu, T., Meyer, C. A., Eeckhoute, J., Johnson, D. S., Bernstein, B. E.,  
926 Nusbaum, C., Myers, R. M., Brown, M., Li, W. & Liu, X. S. Model-based analysis of  
927 ChIP-Seq (MACS). *Genome Biol* **9**, R137, doi:10.1186/gb-2008-9-9-r137 (2008).  
928
